# Supplementary material for: A path reconstruction method integrating dead-reckoning and position fixes applied to humpback whales
Source: PubMed Central journal article supplement (PMC4576411; doi:10.1186/s40462-015-0061-6), 2015-09-21

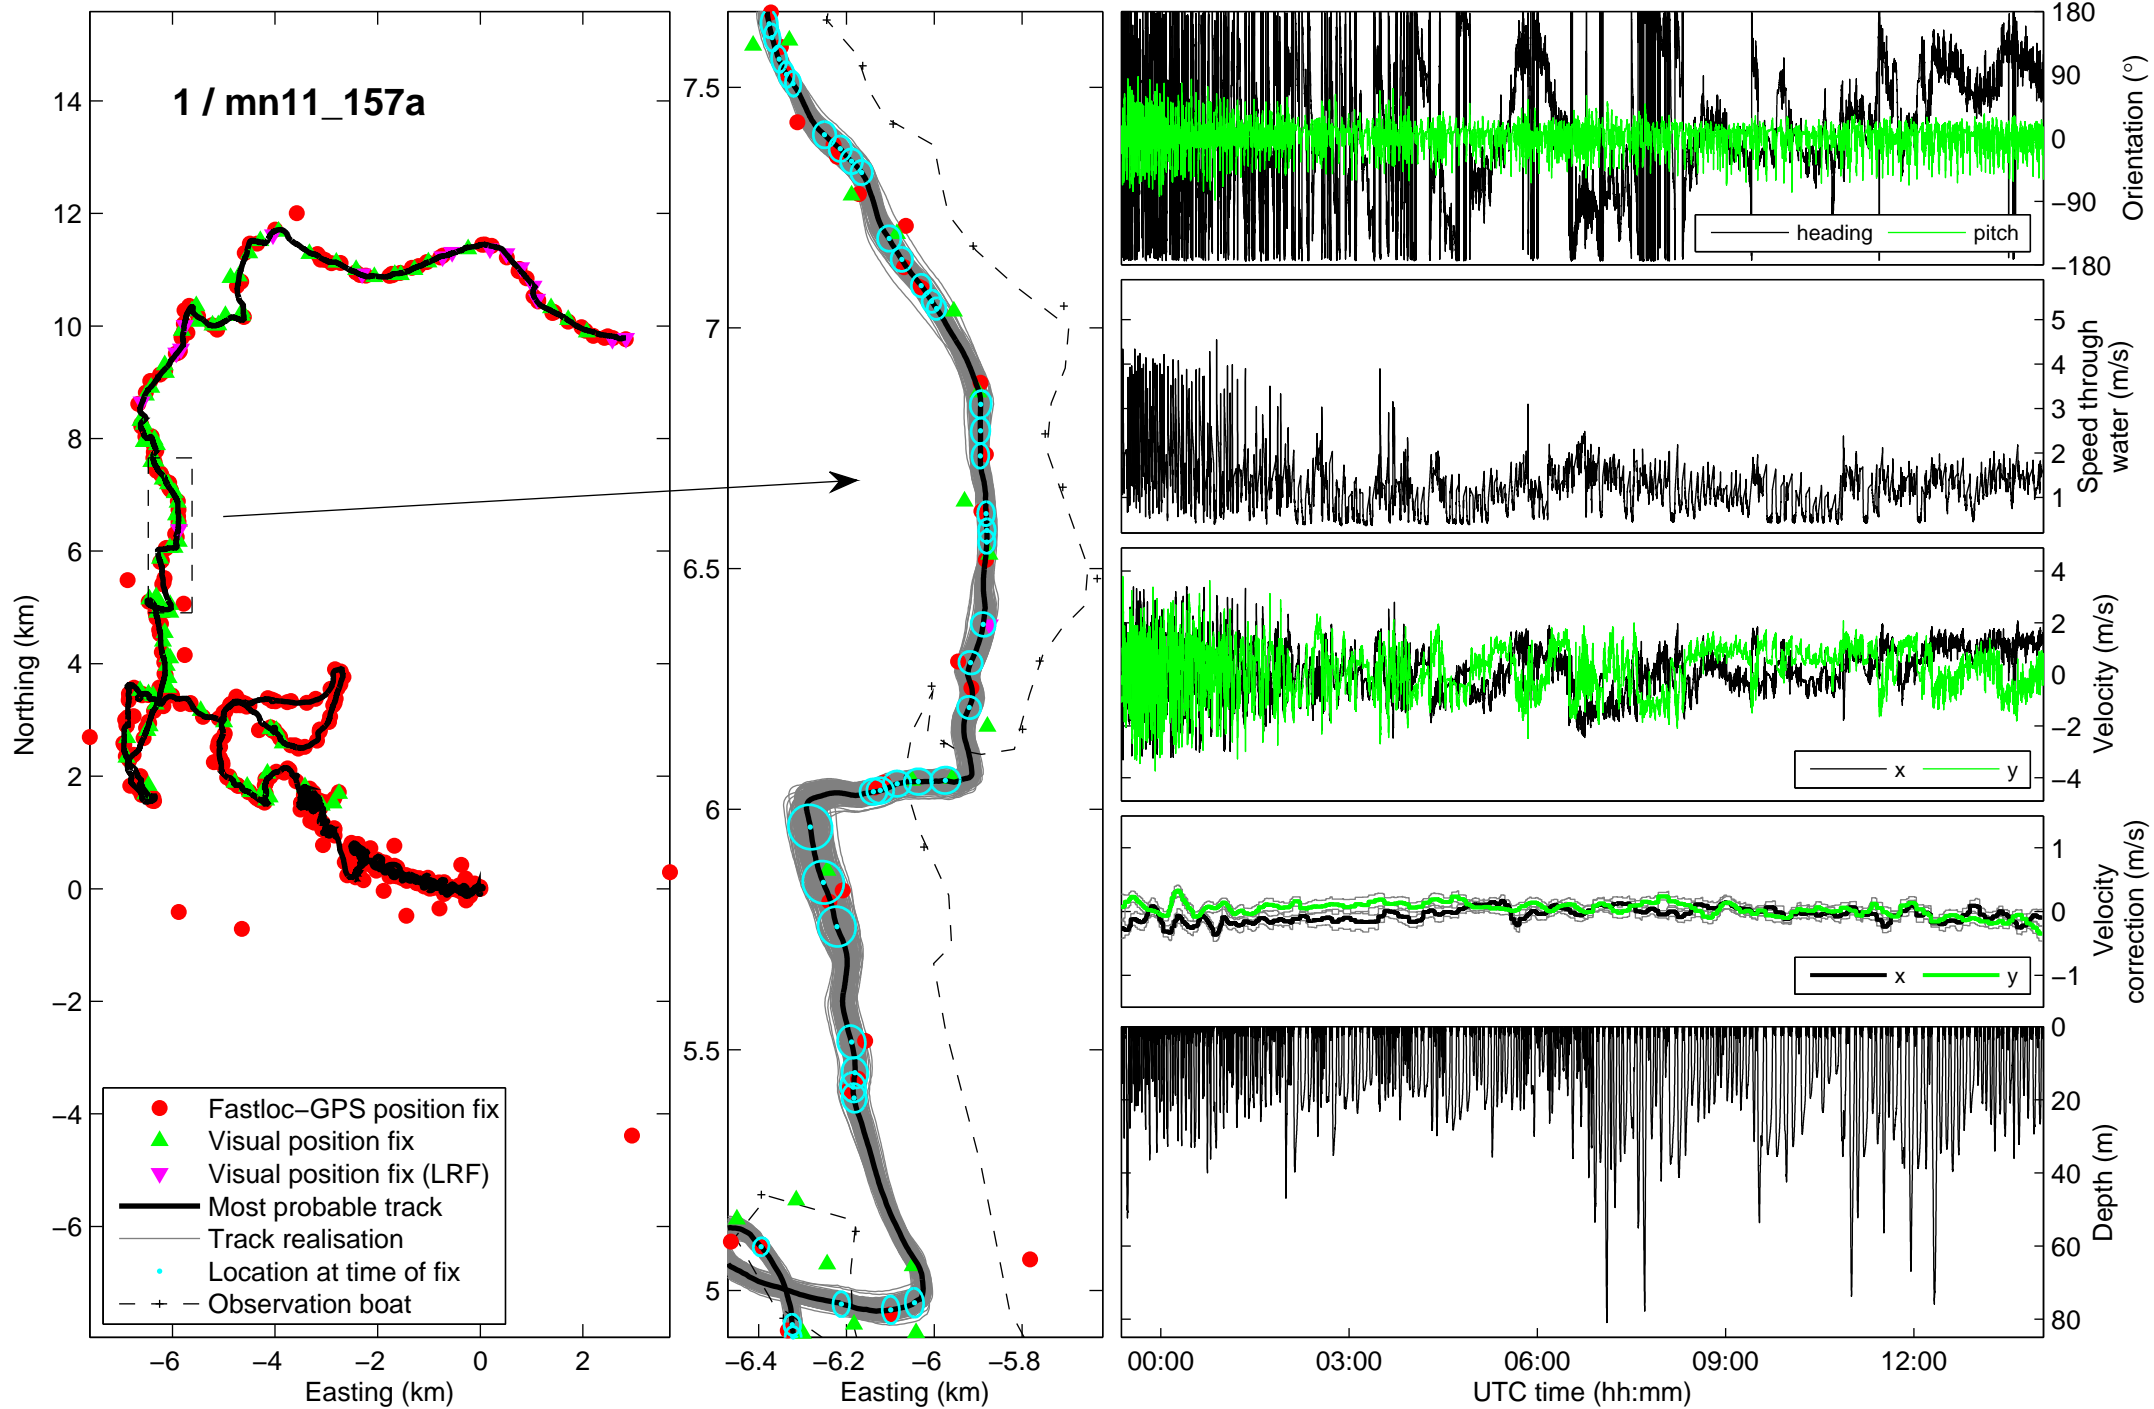

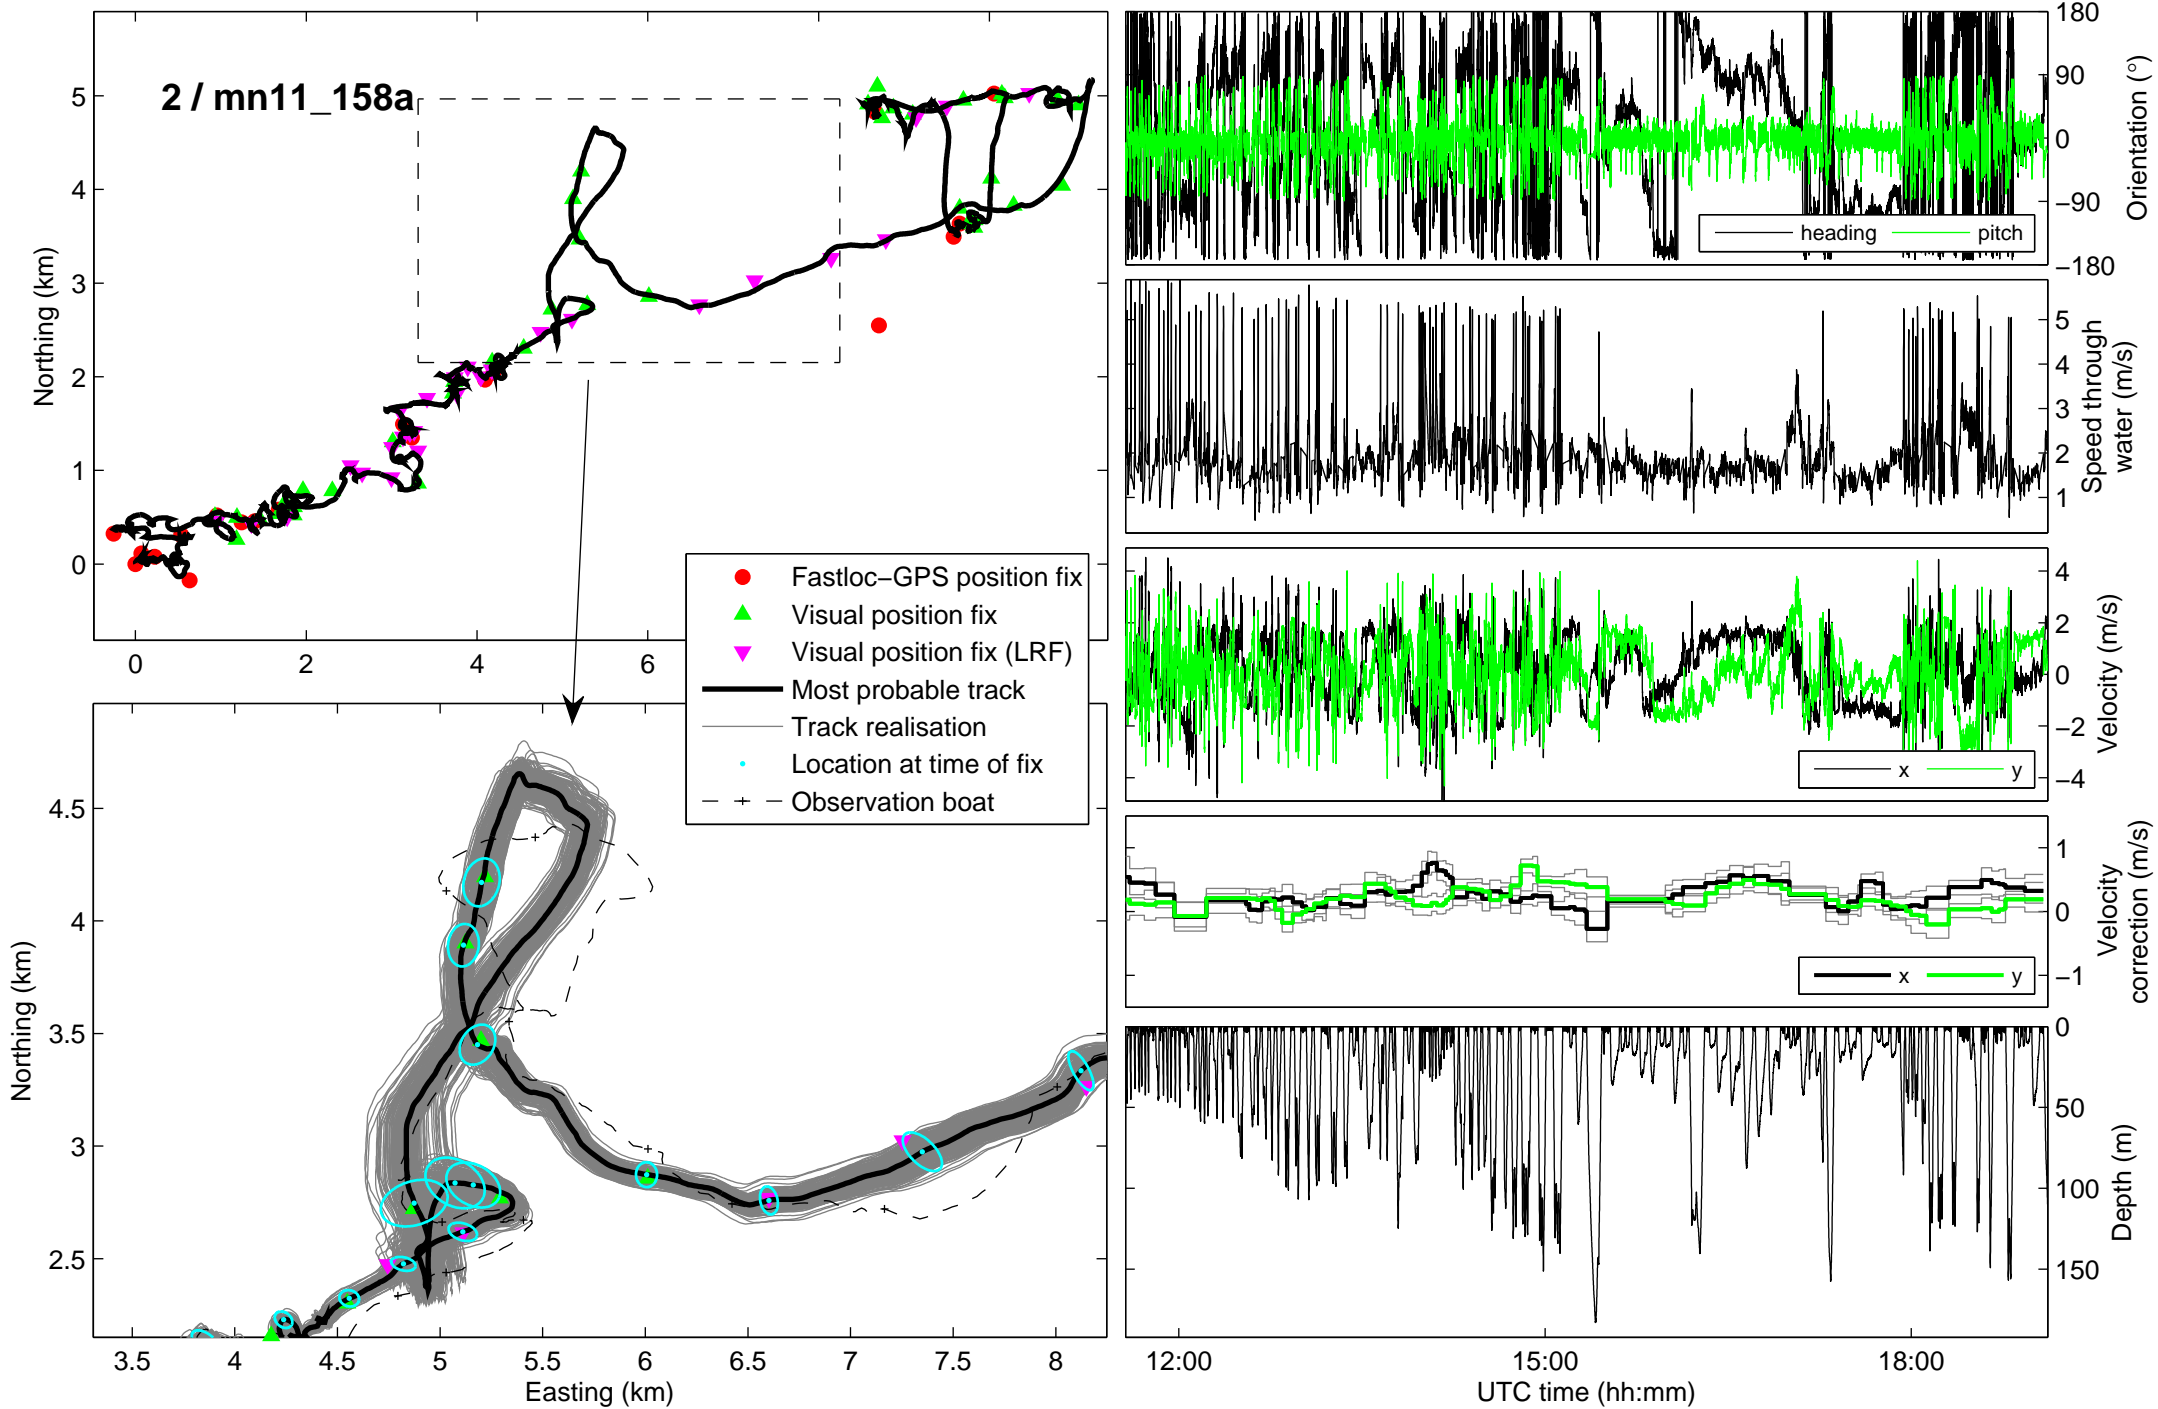

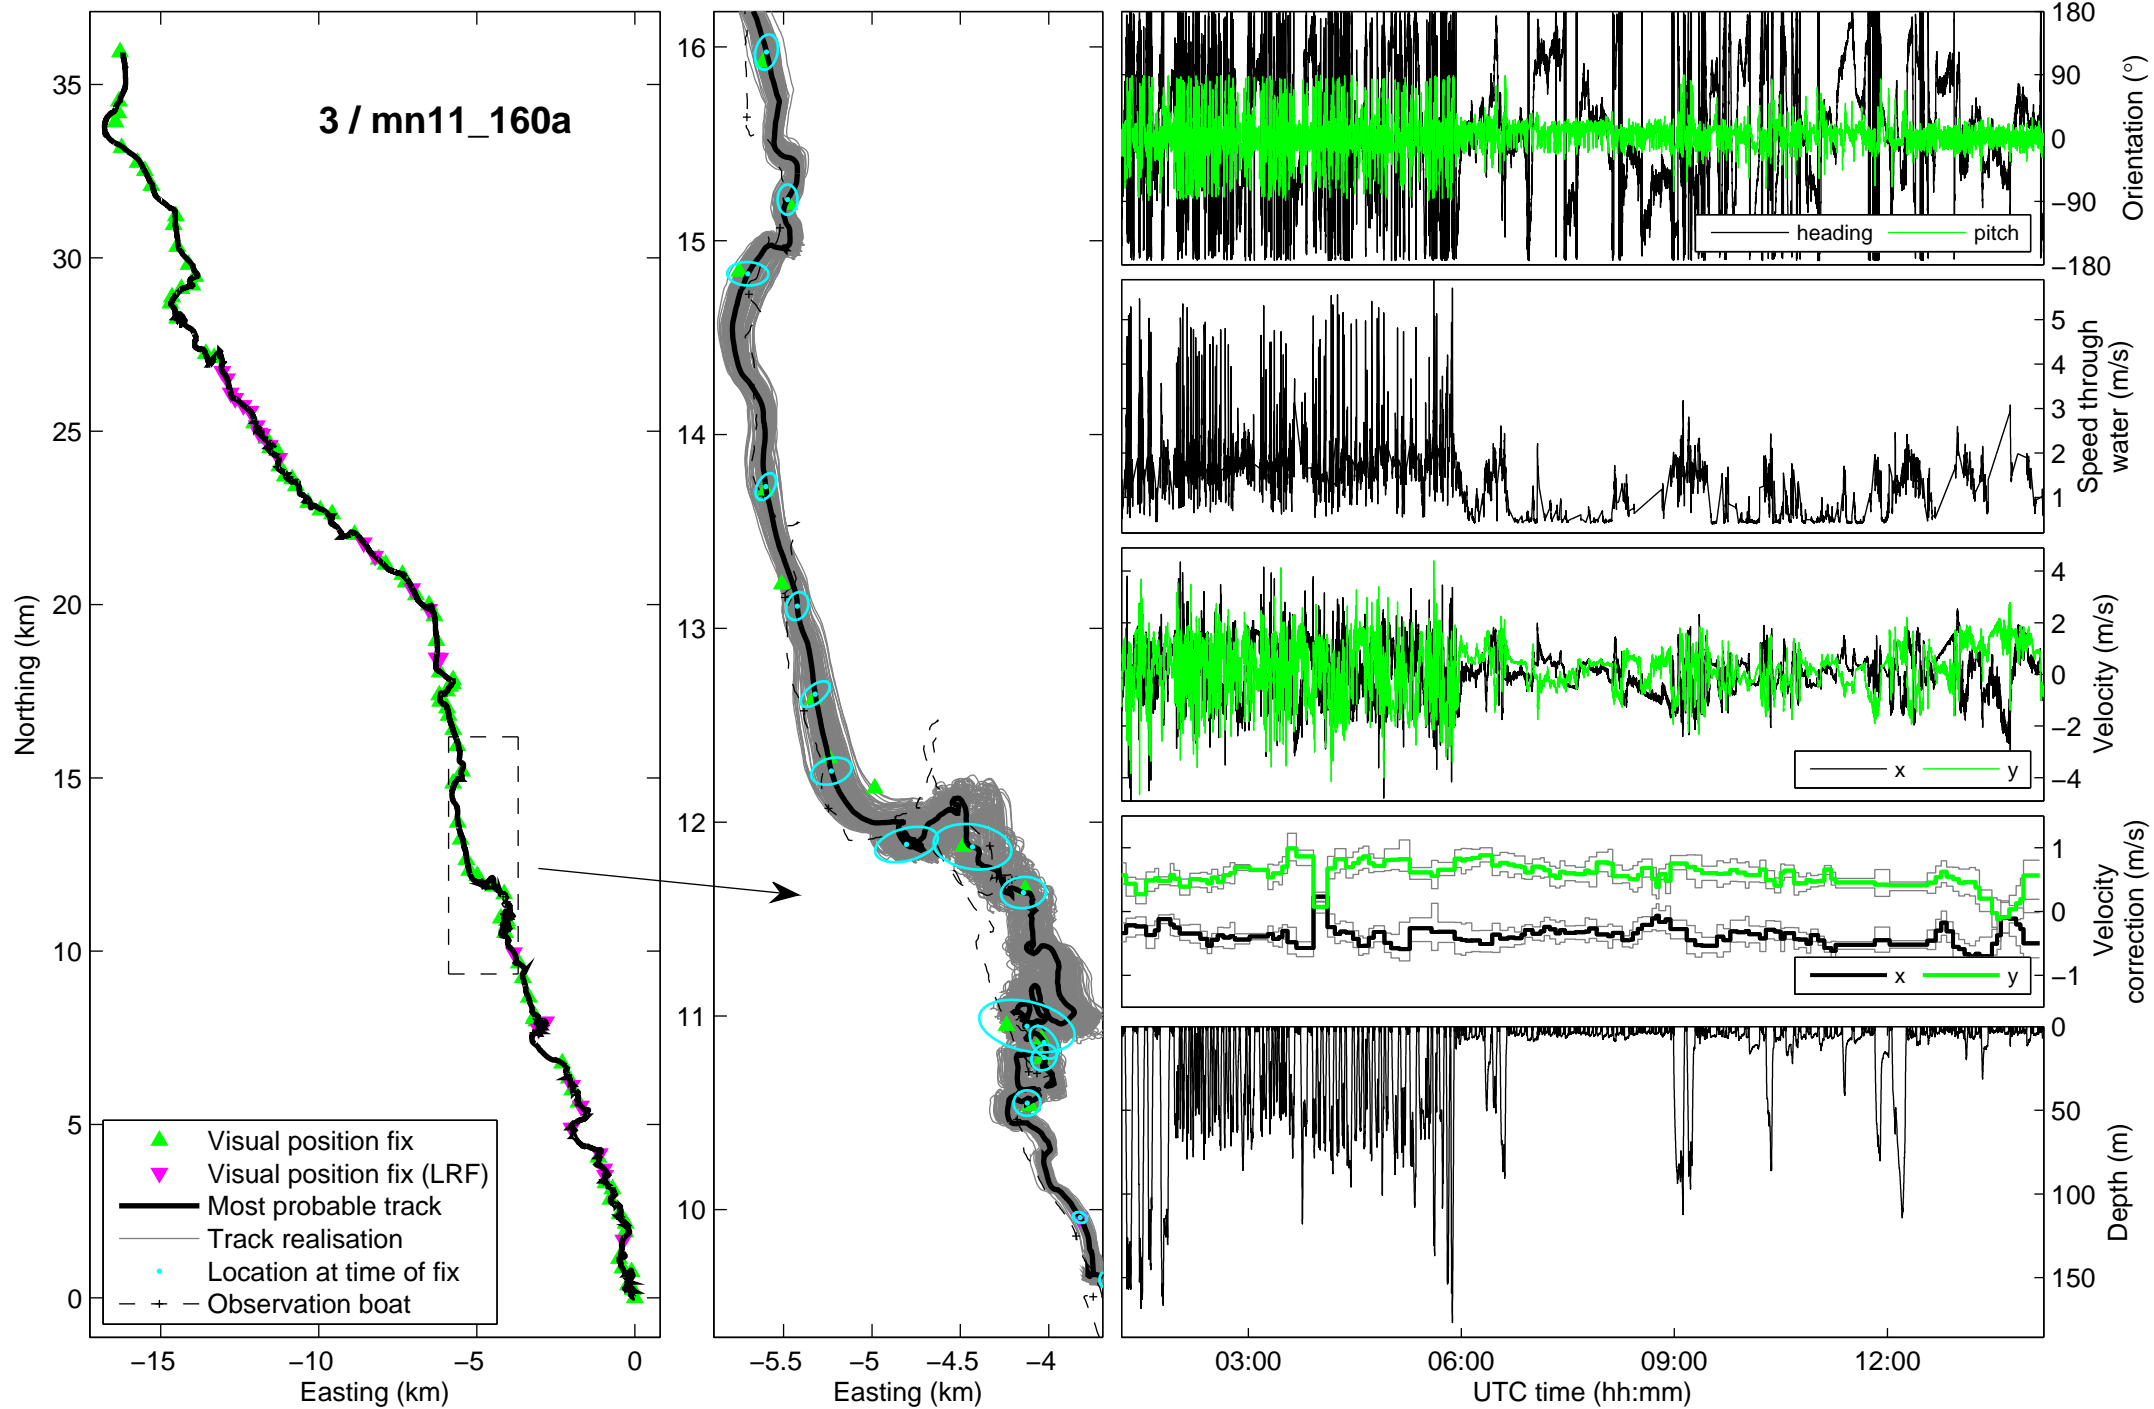

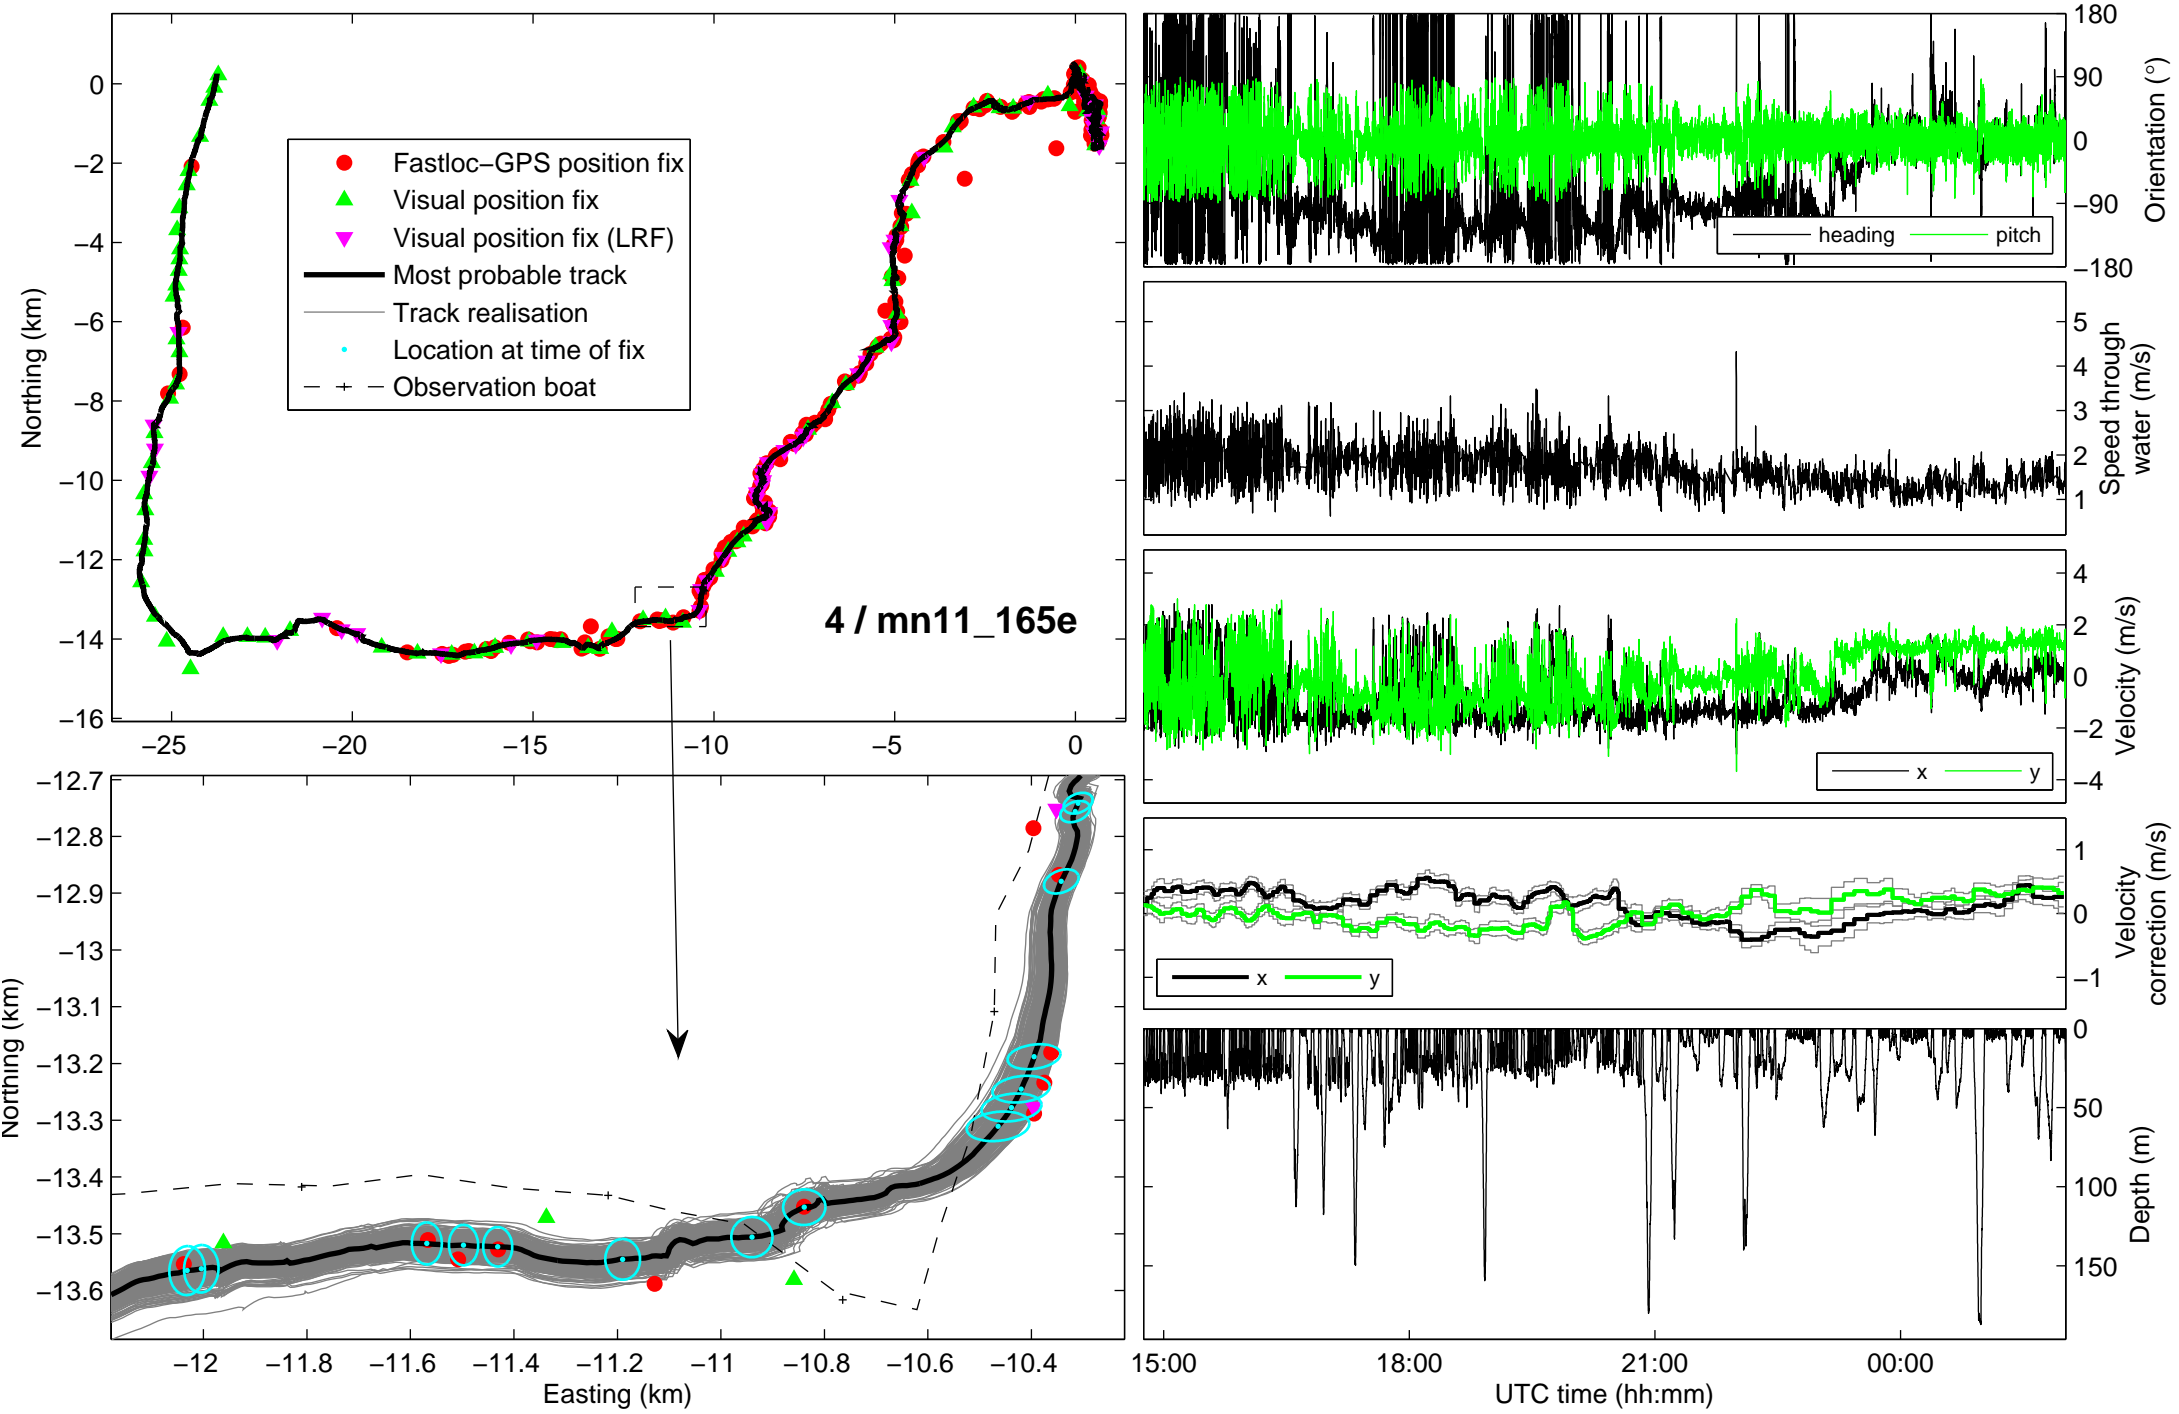

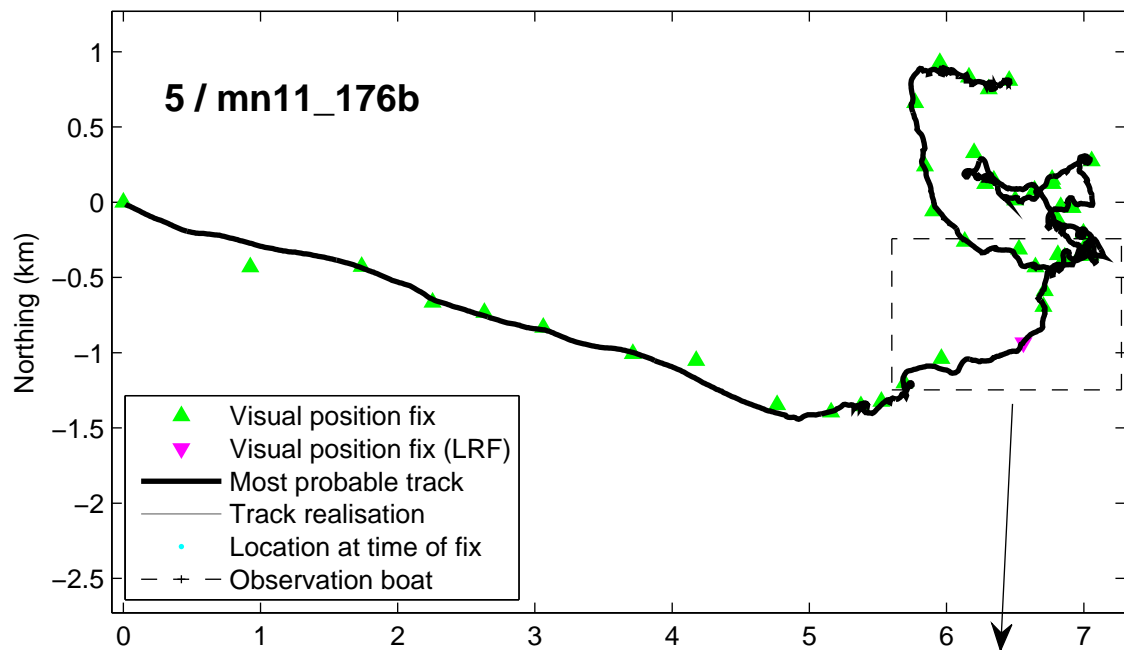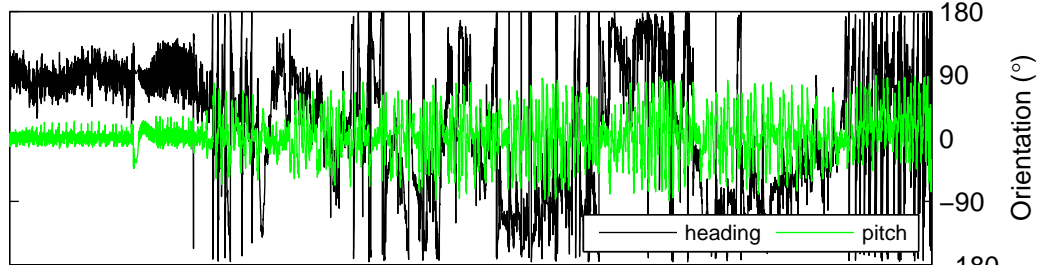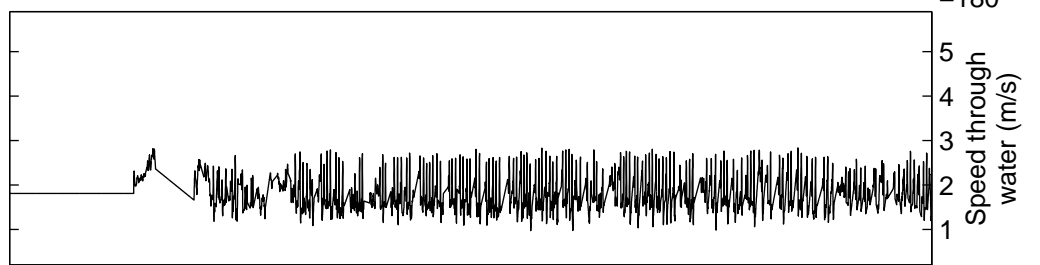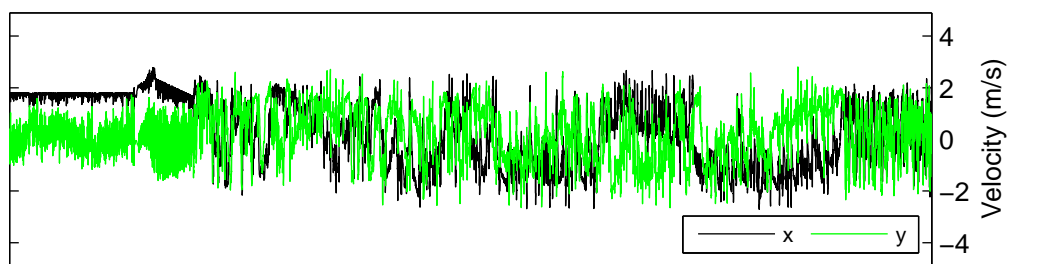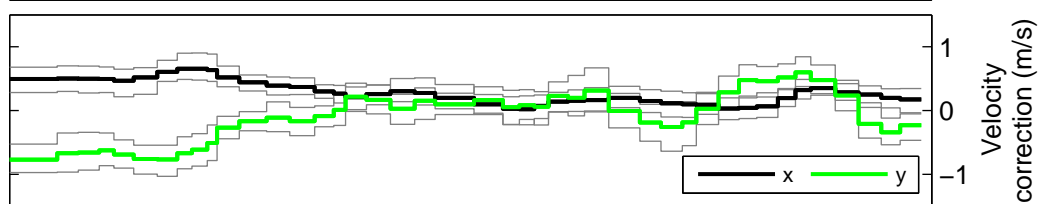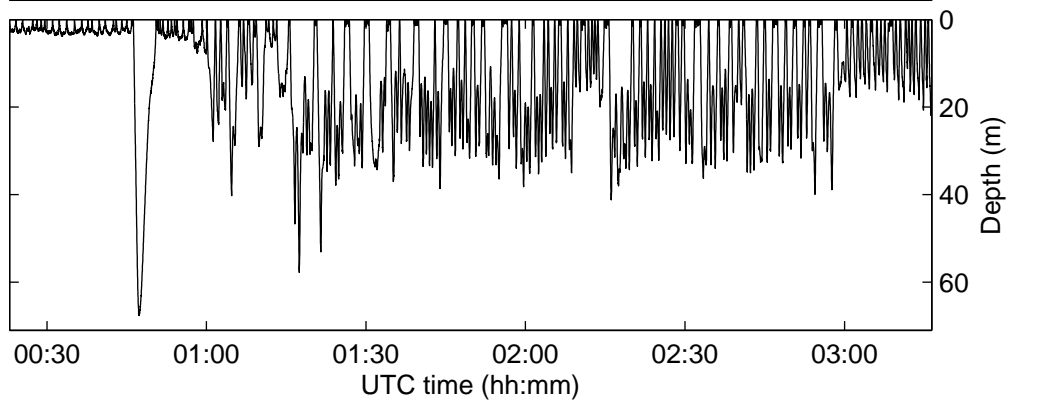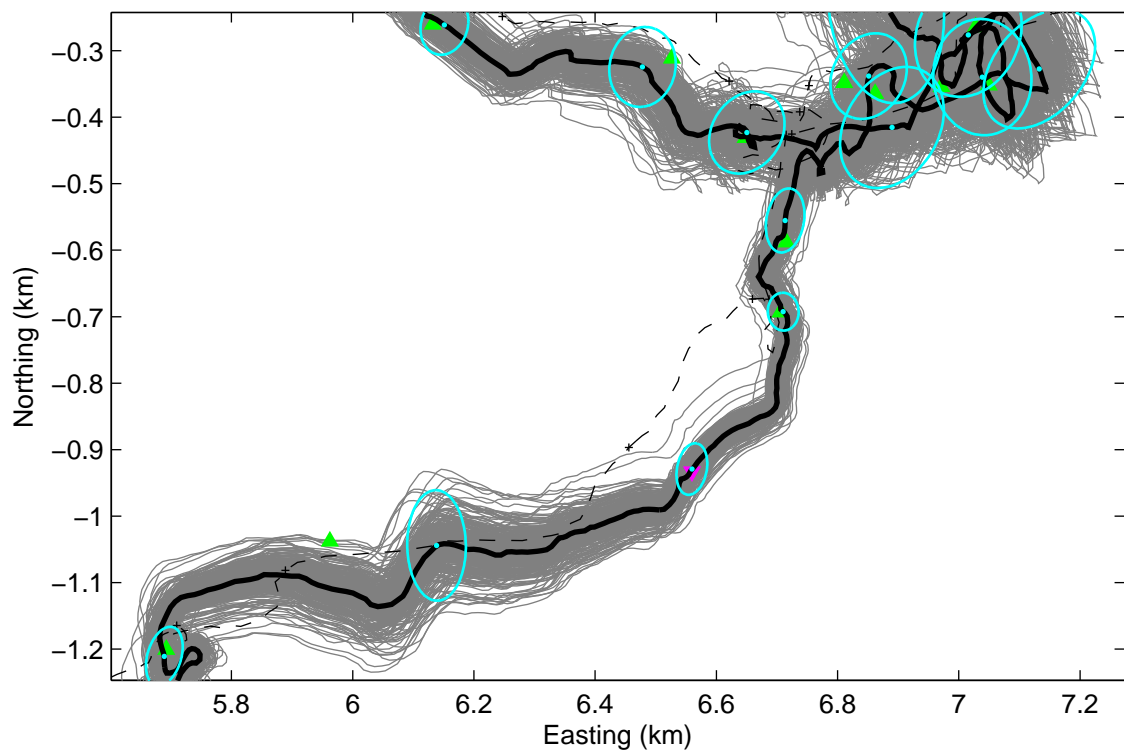

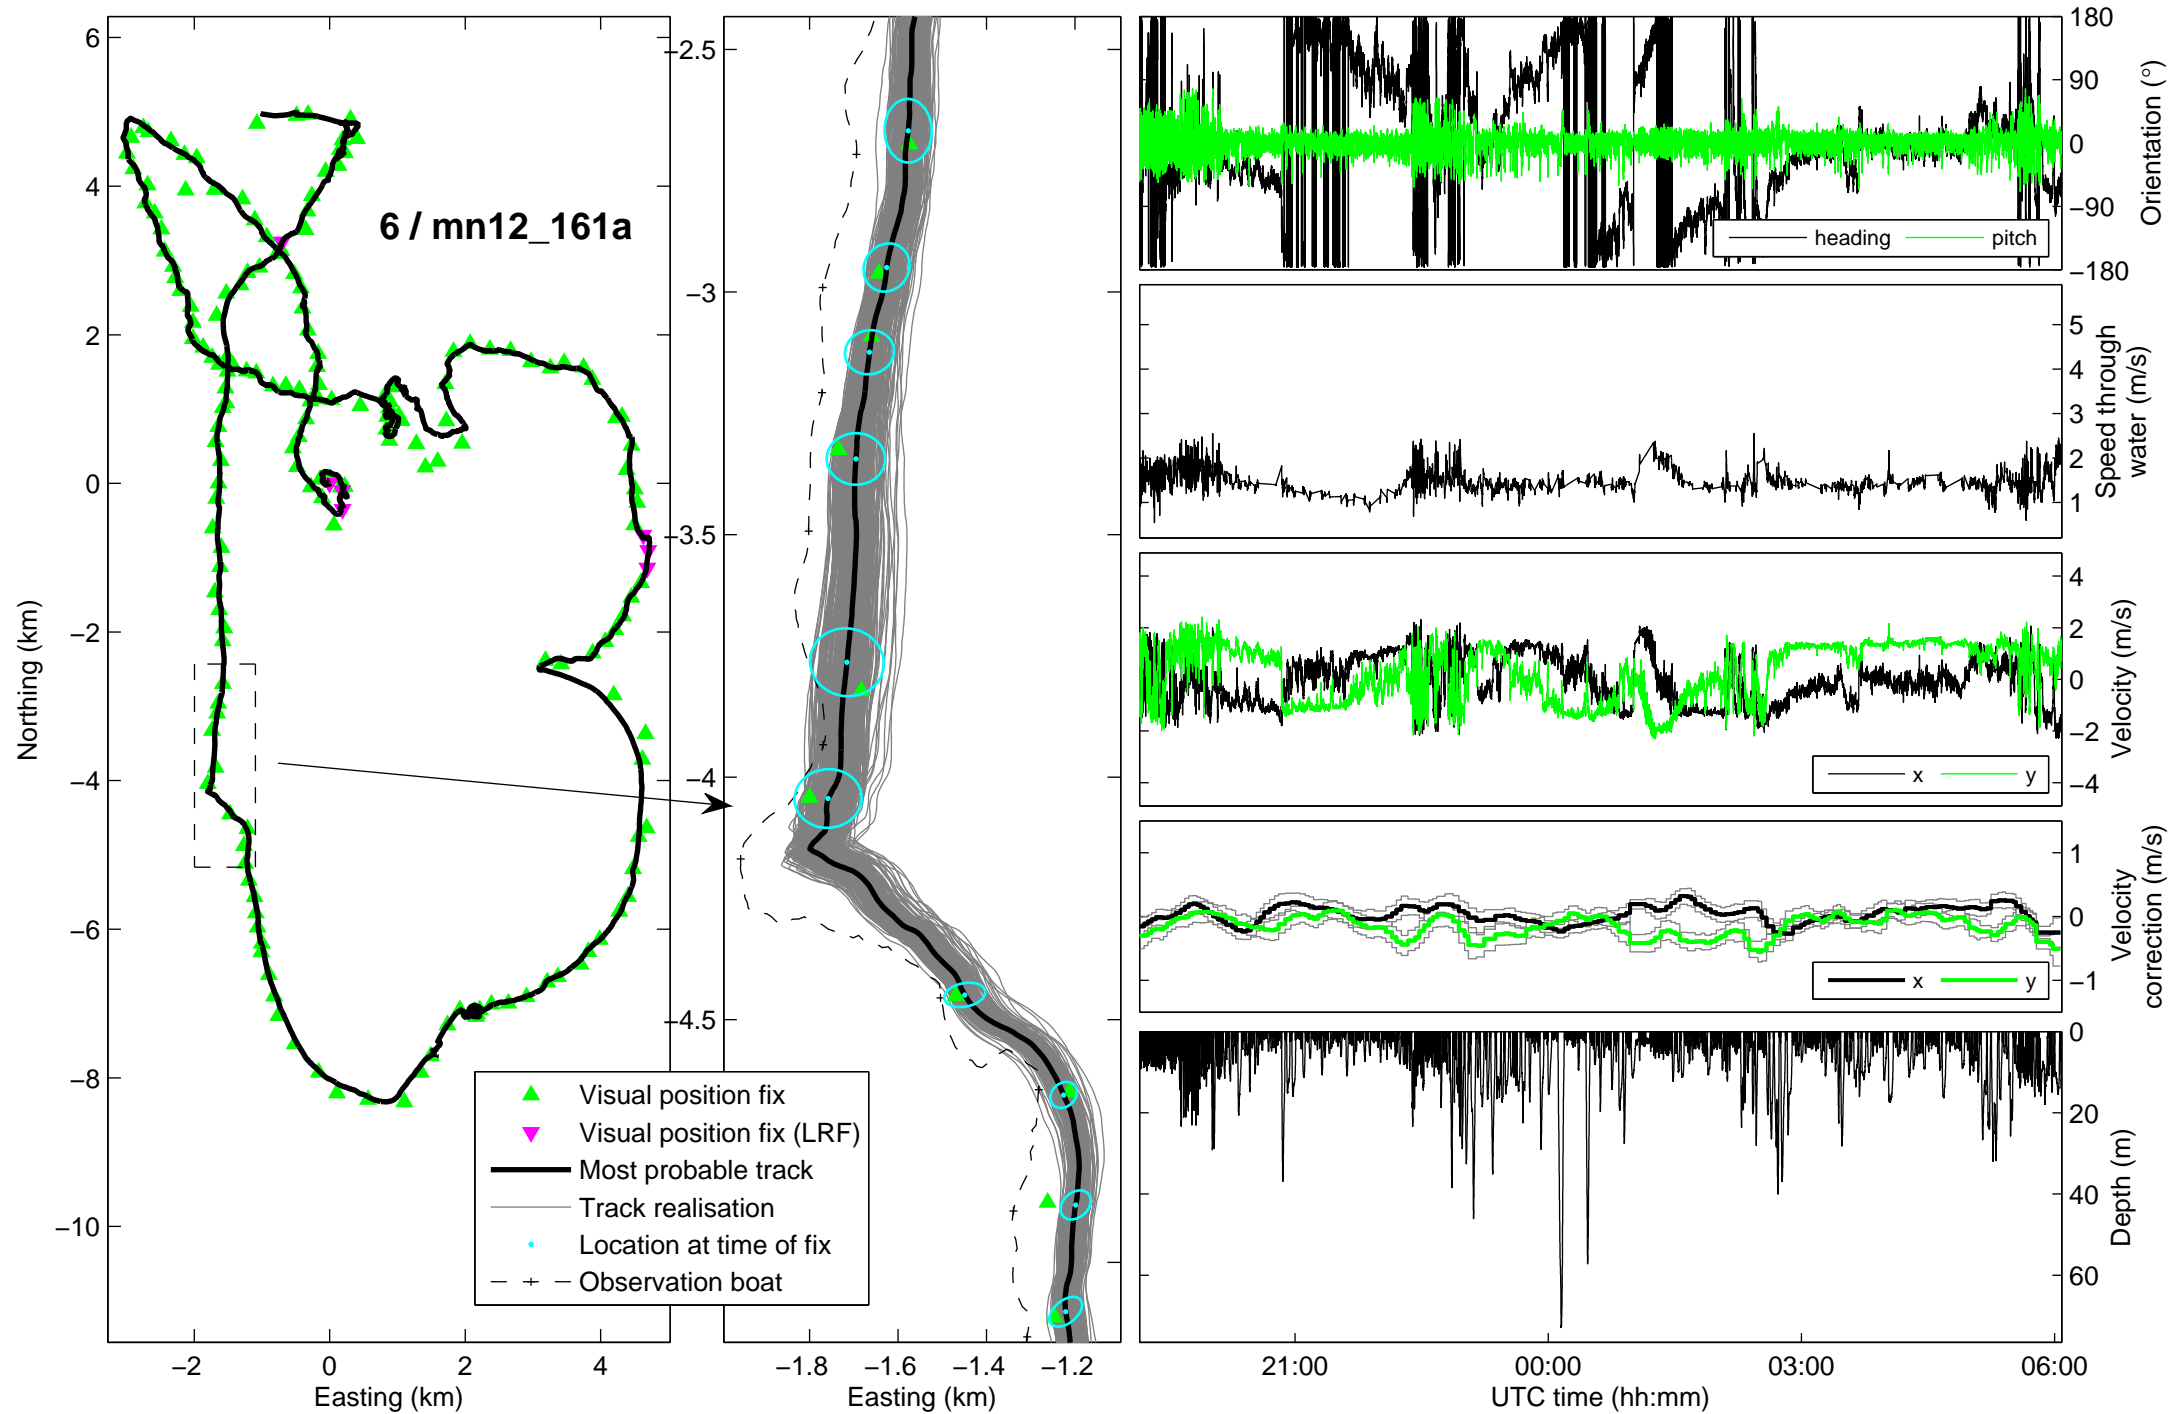

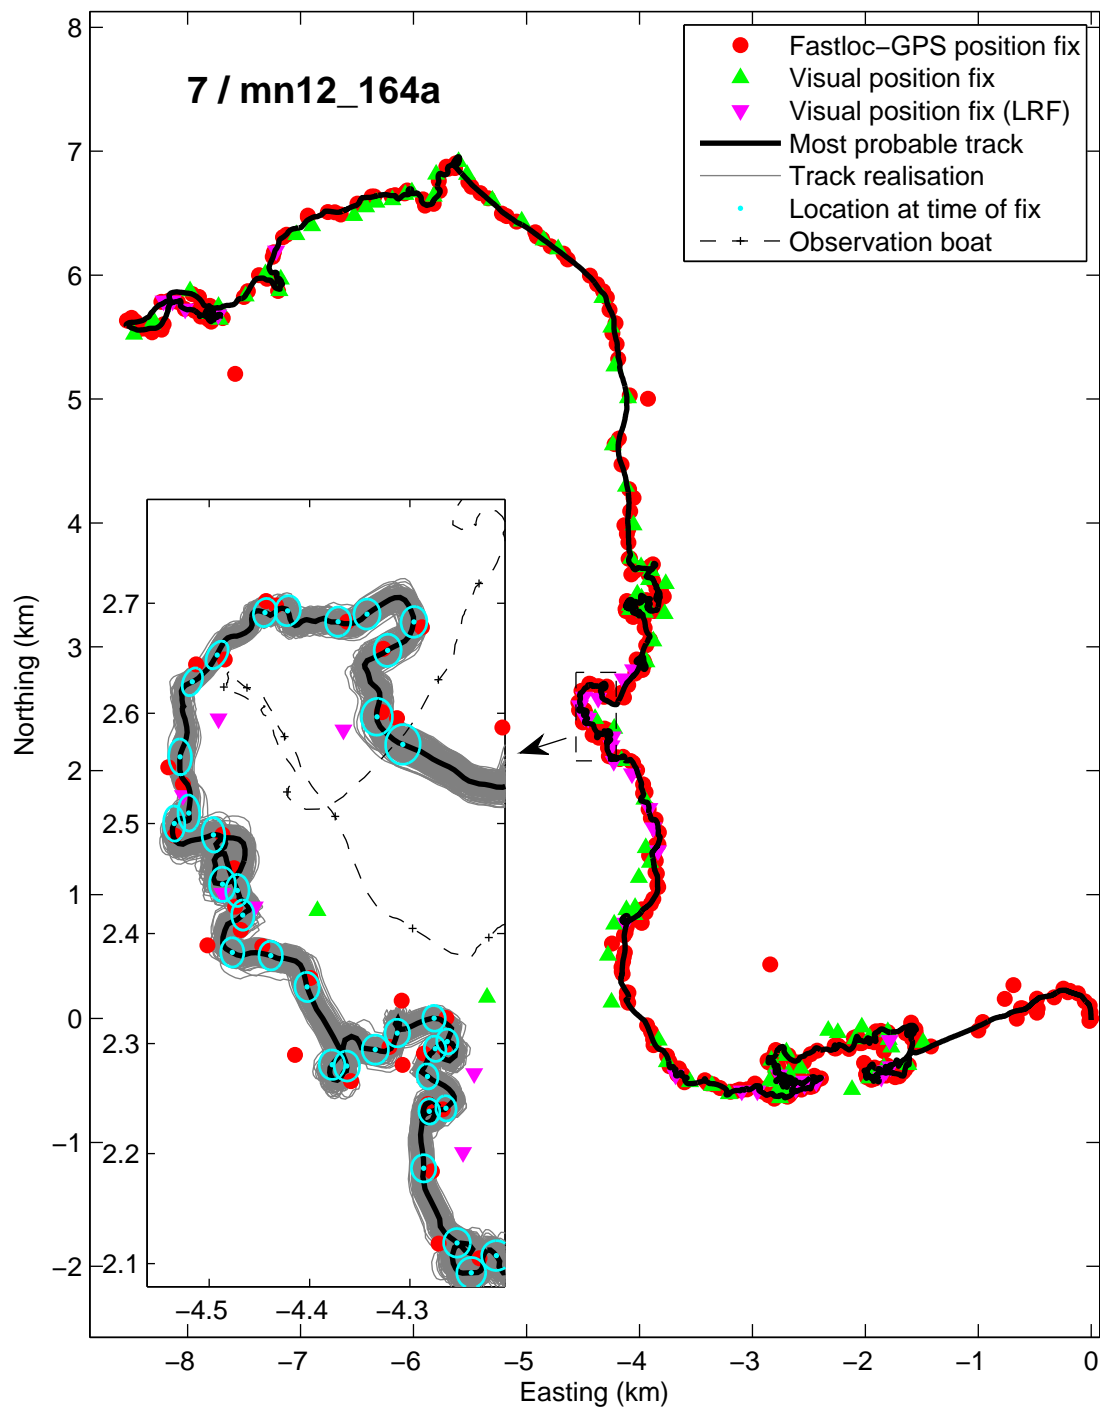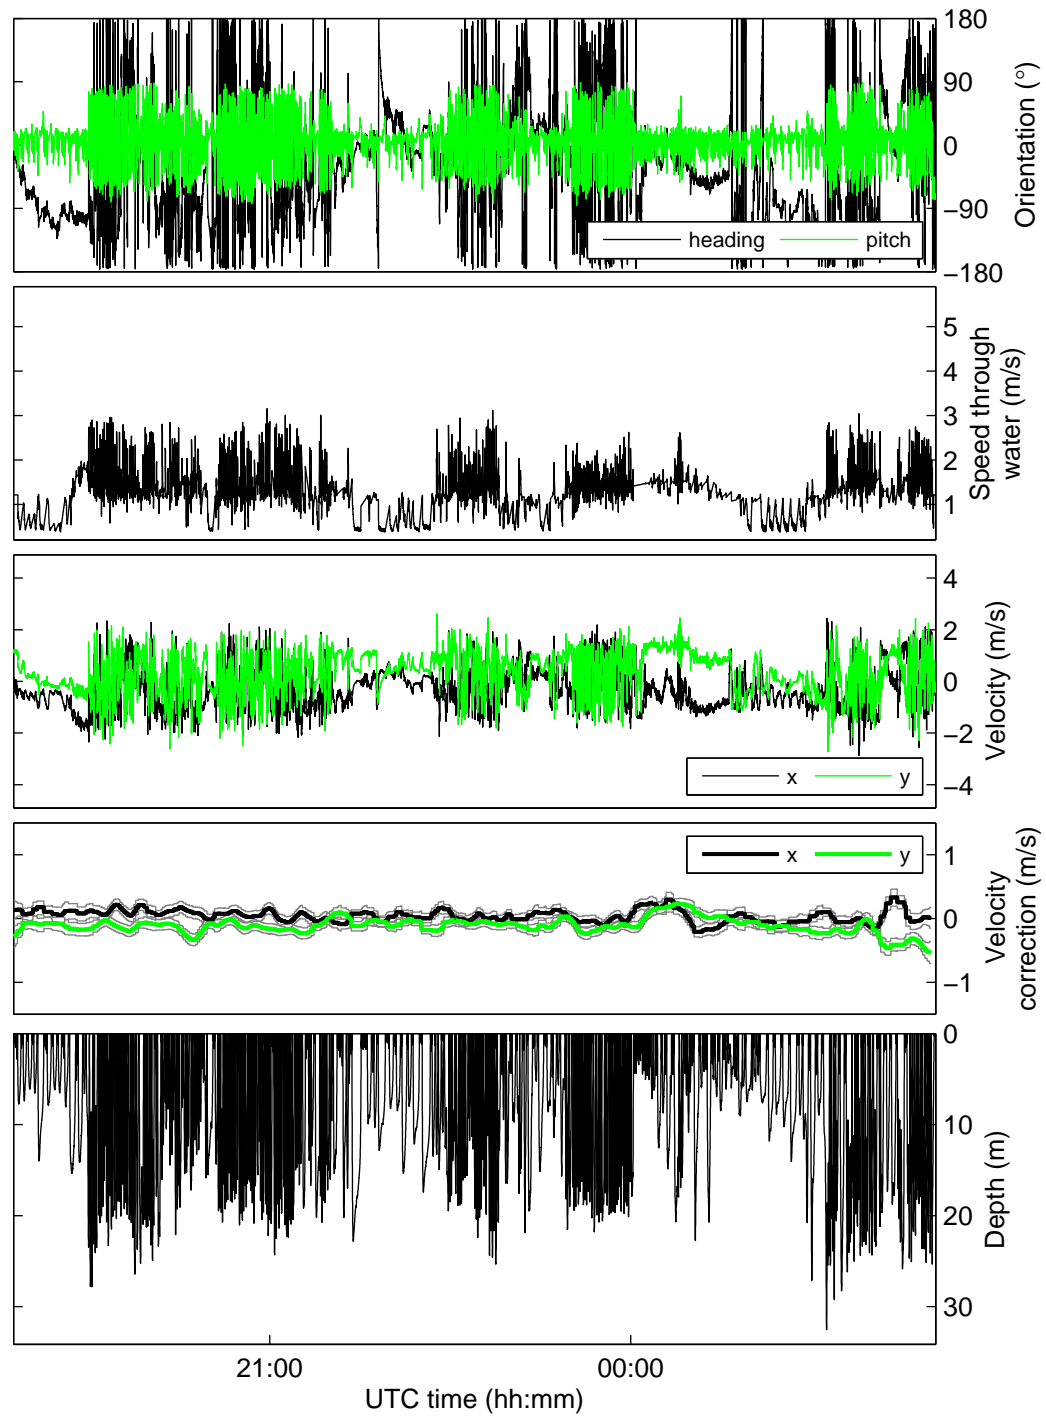

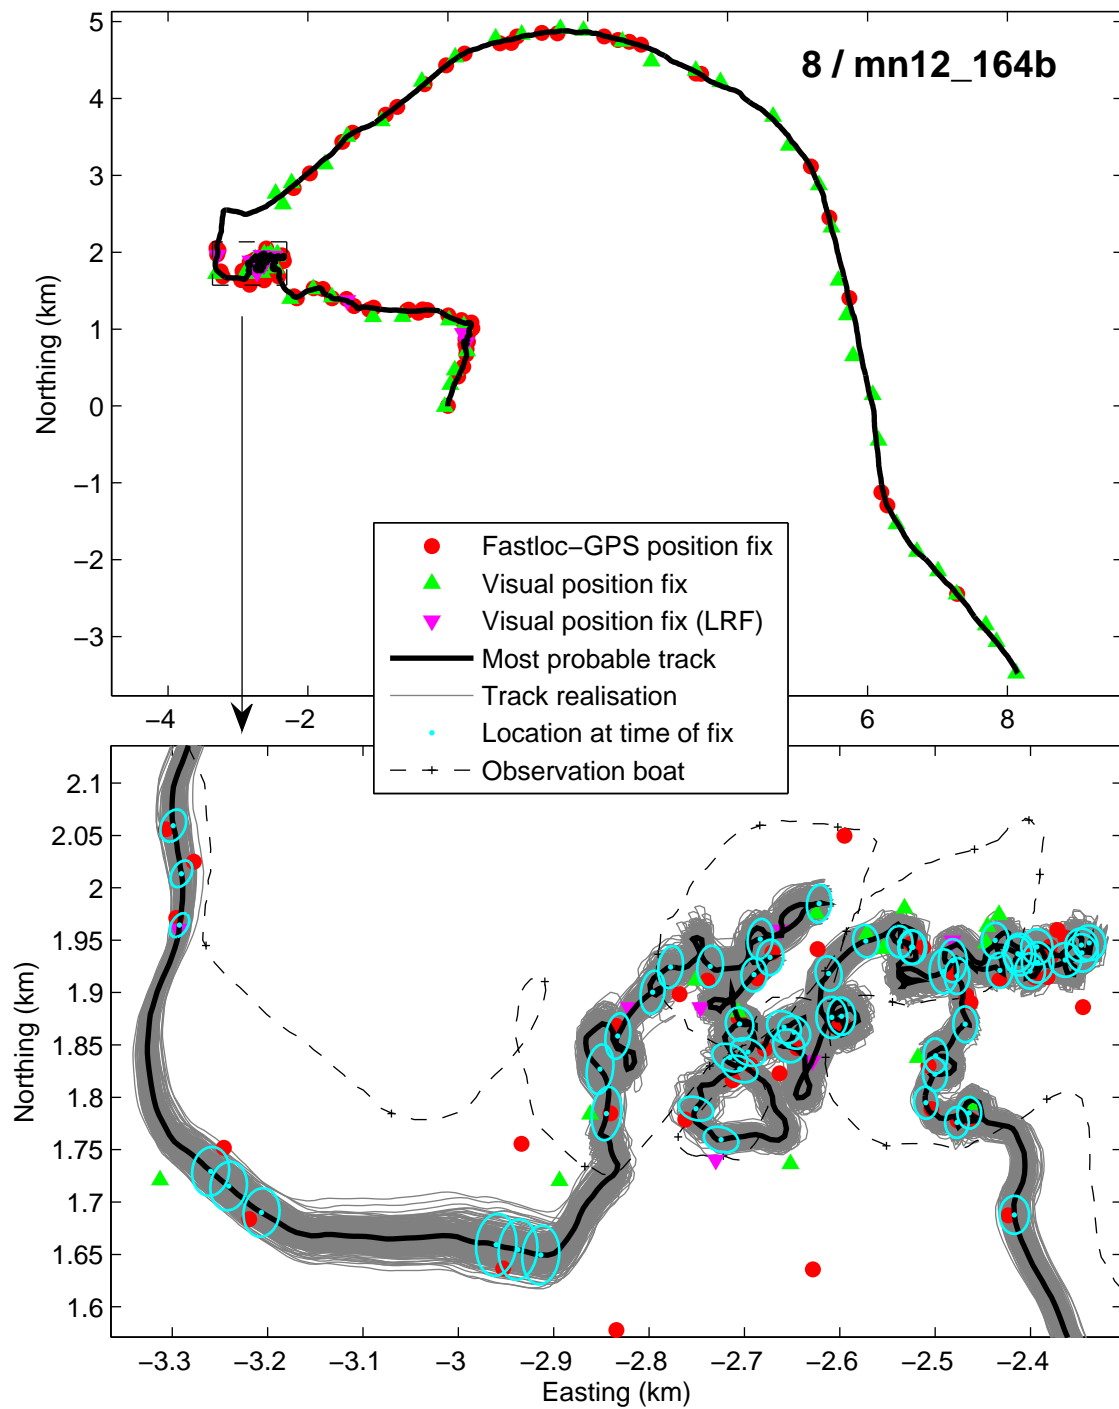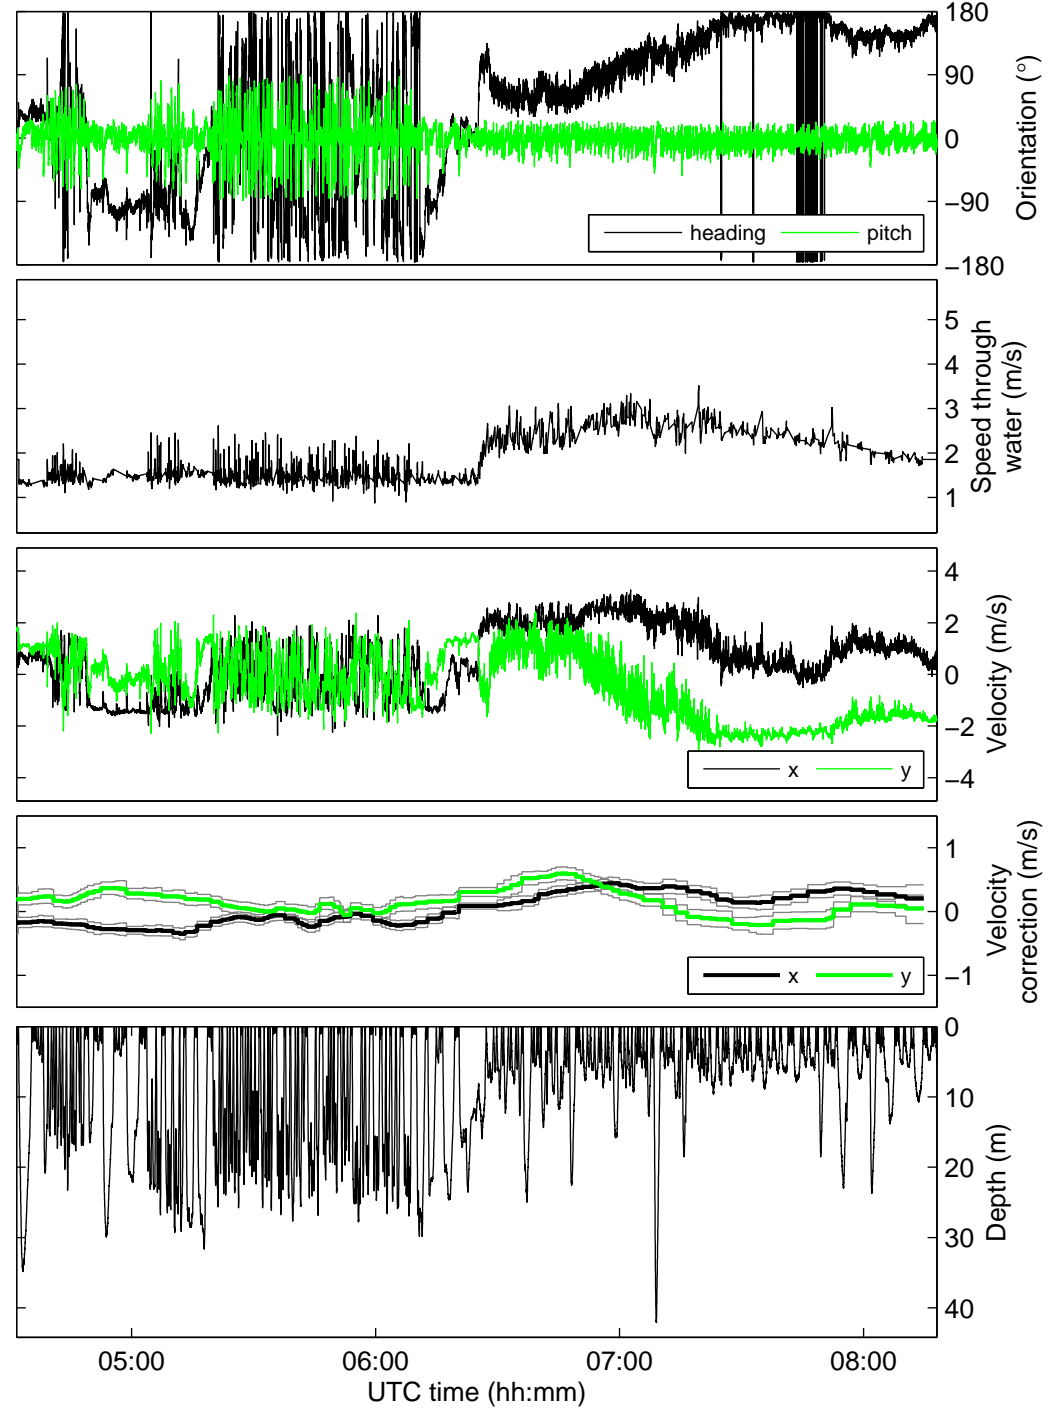



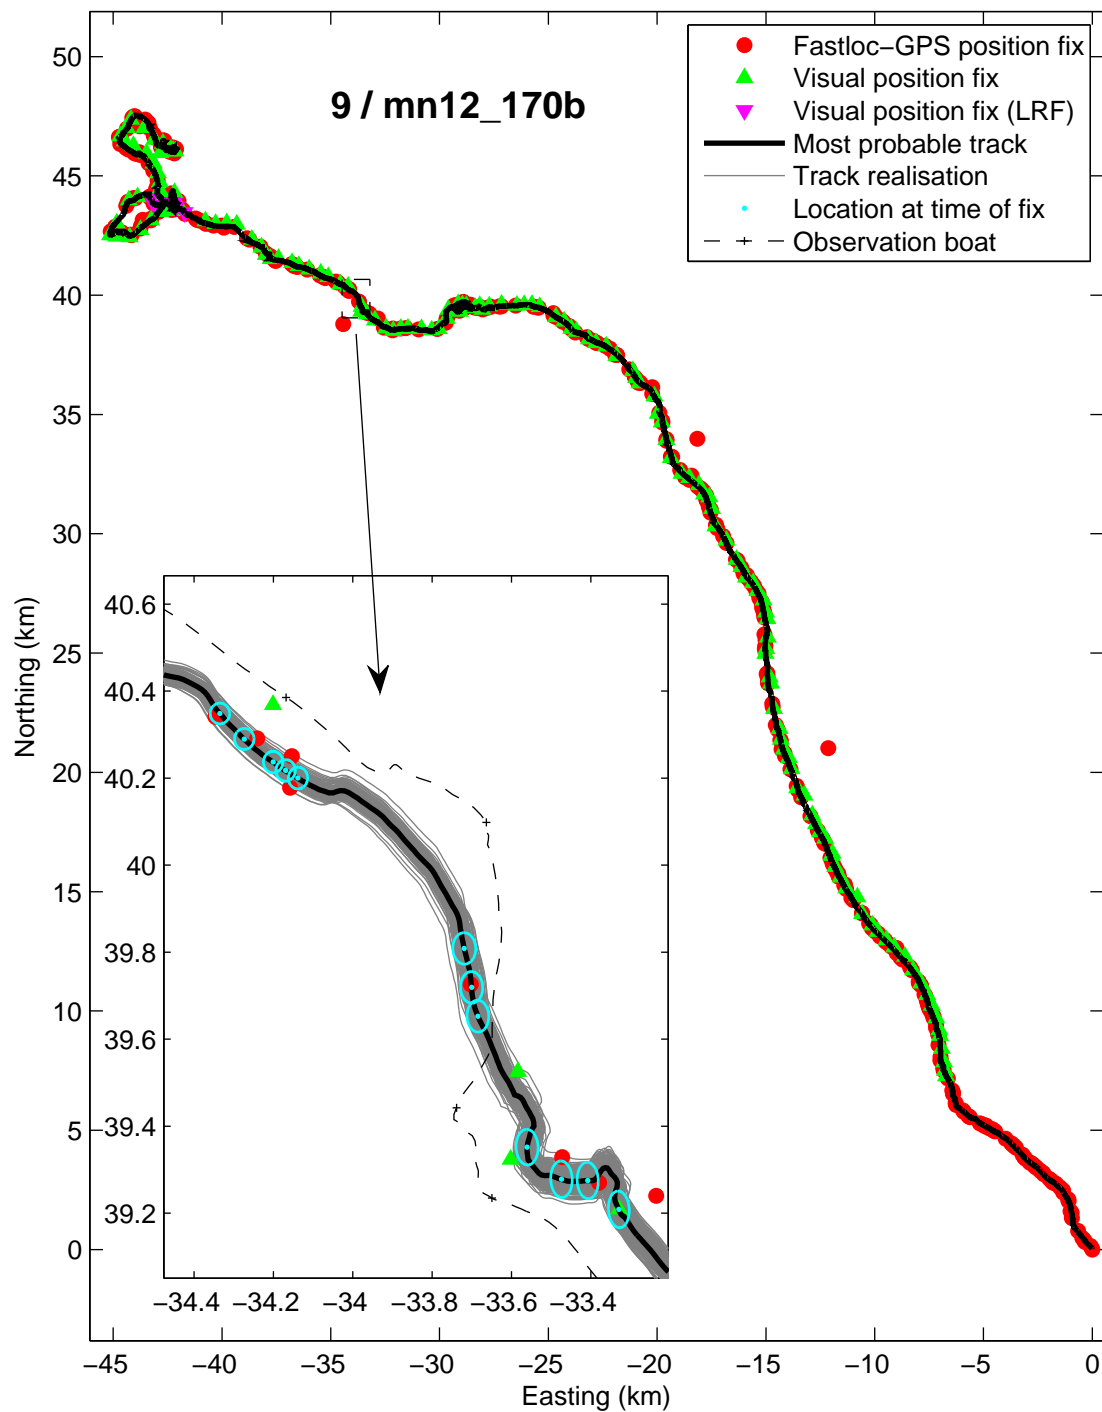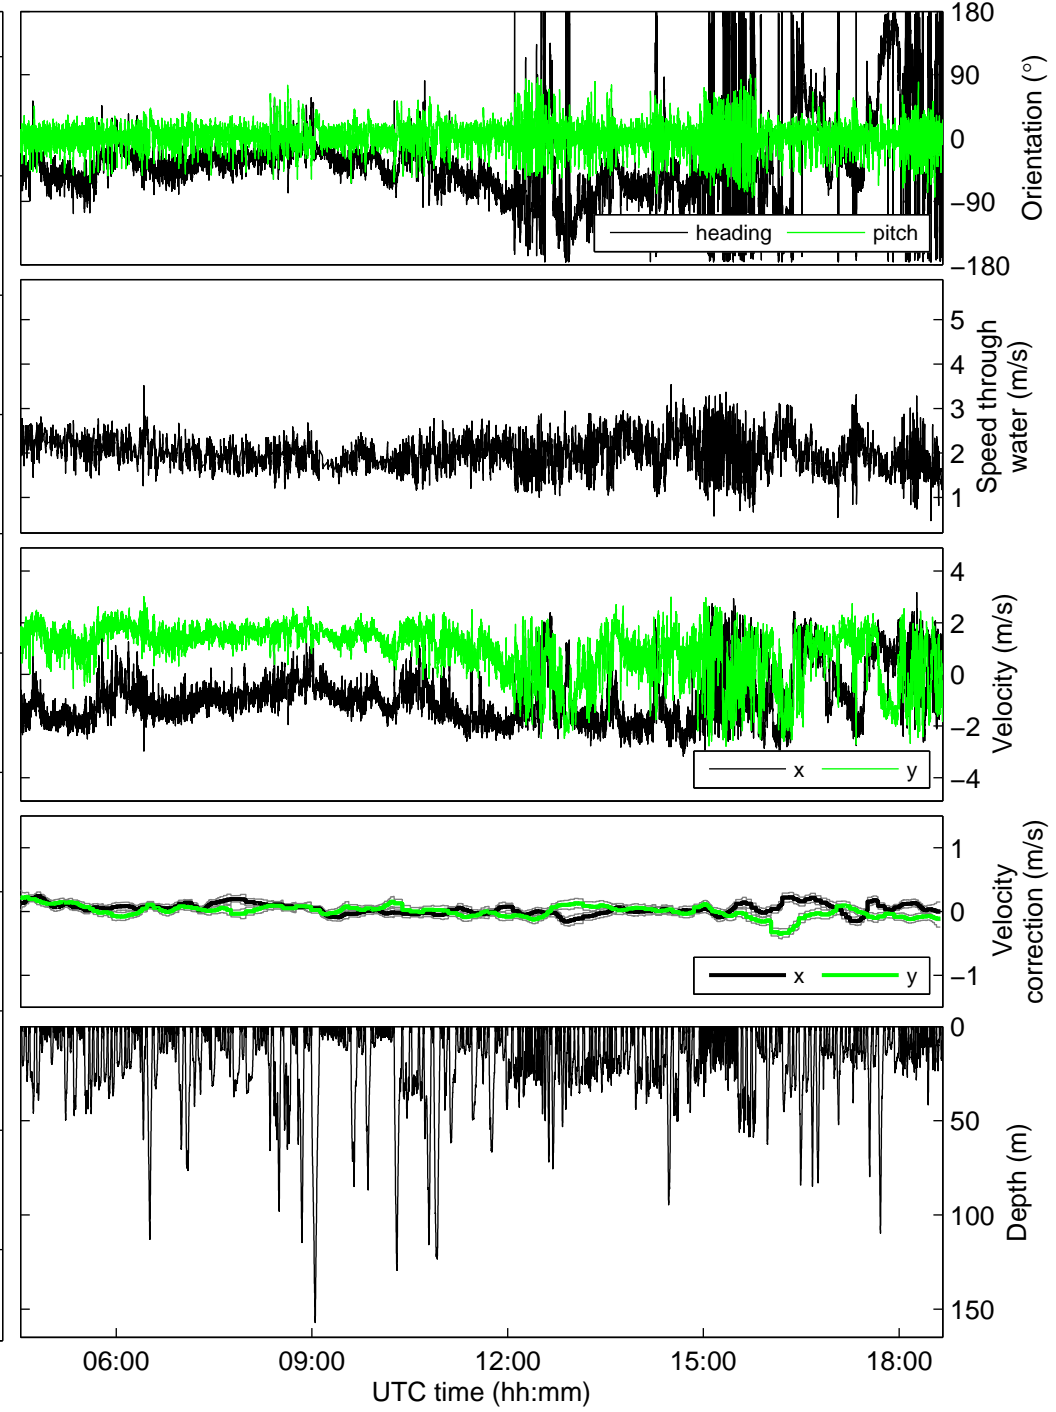

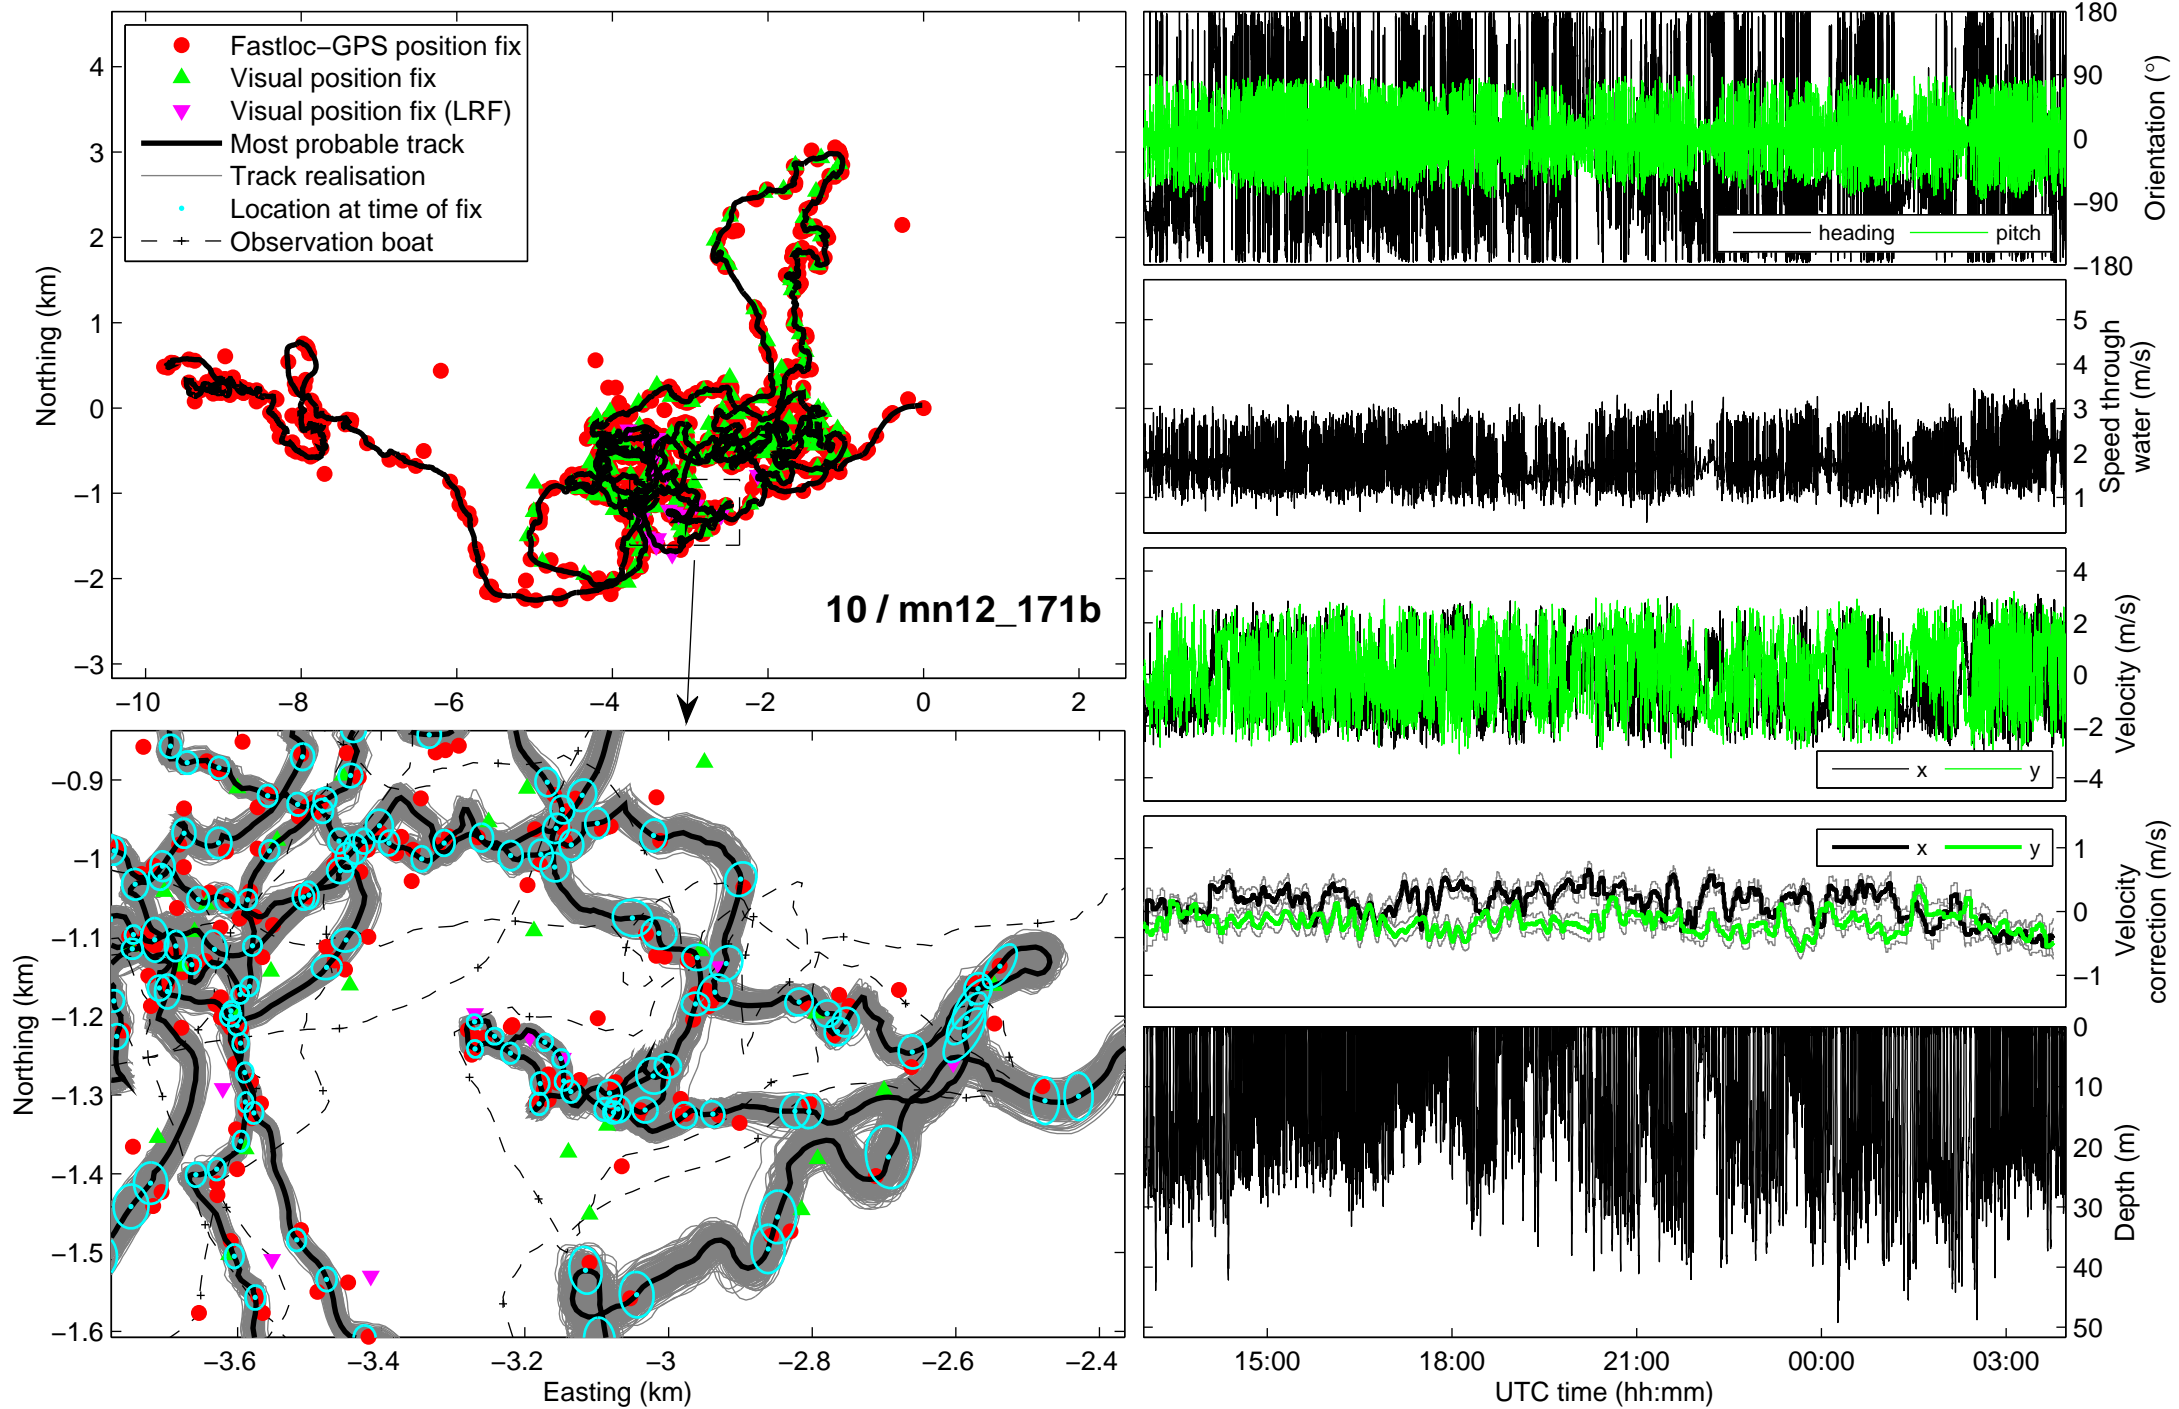

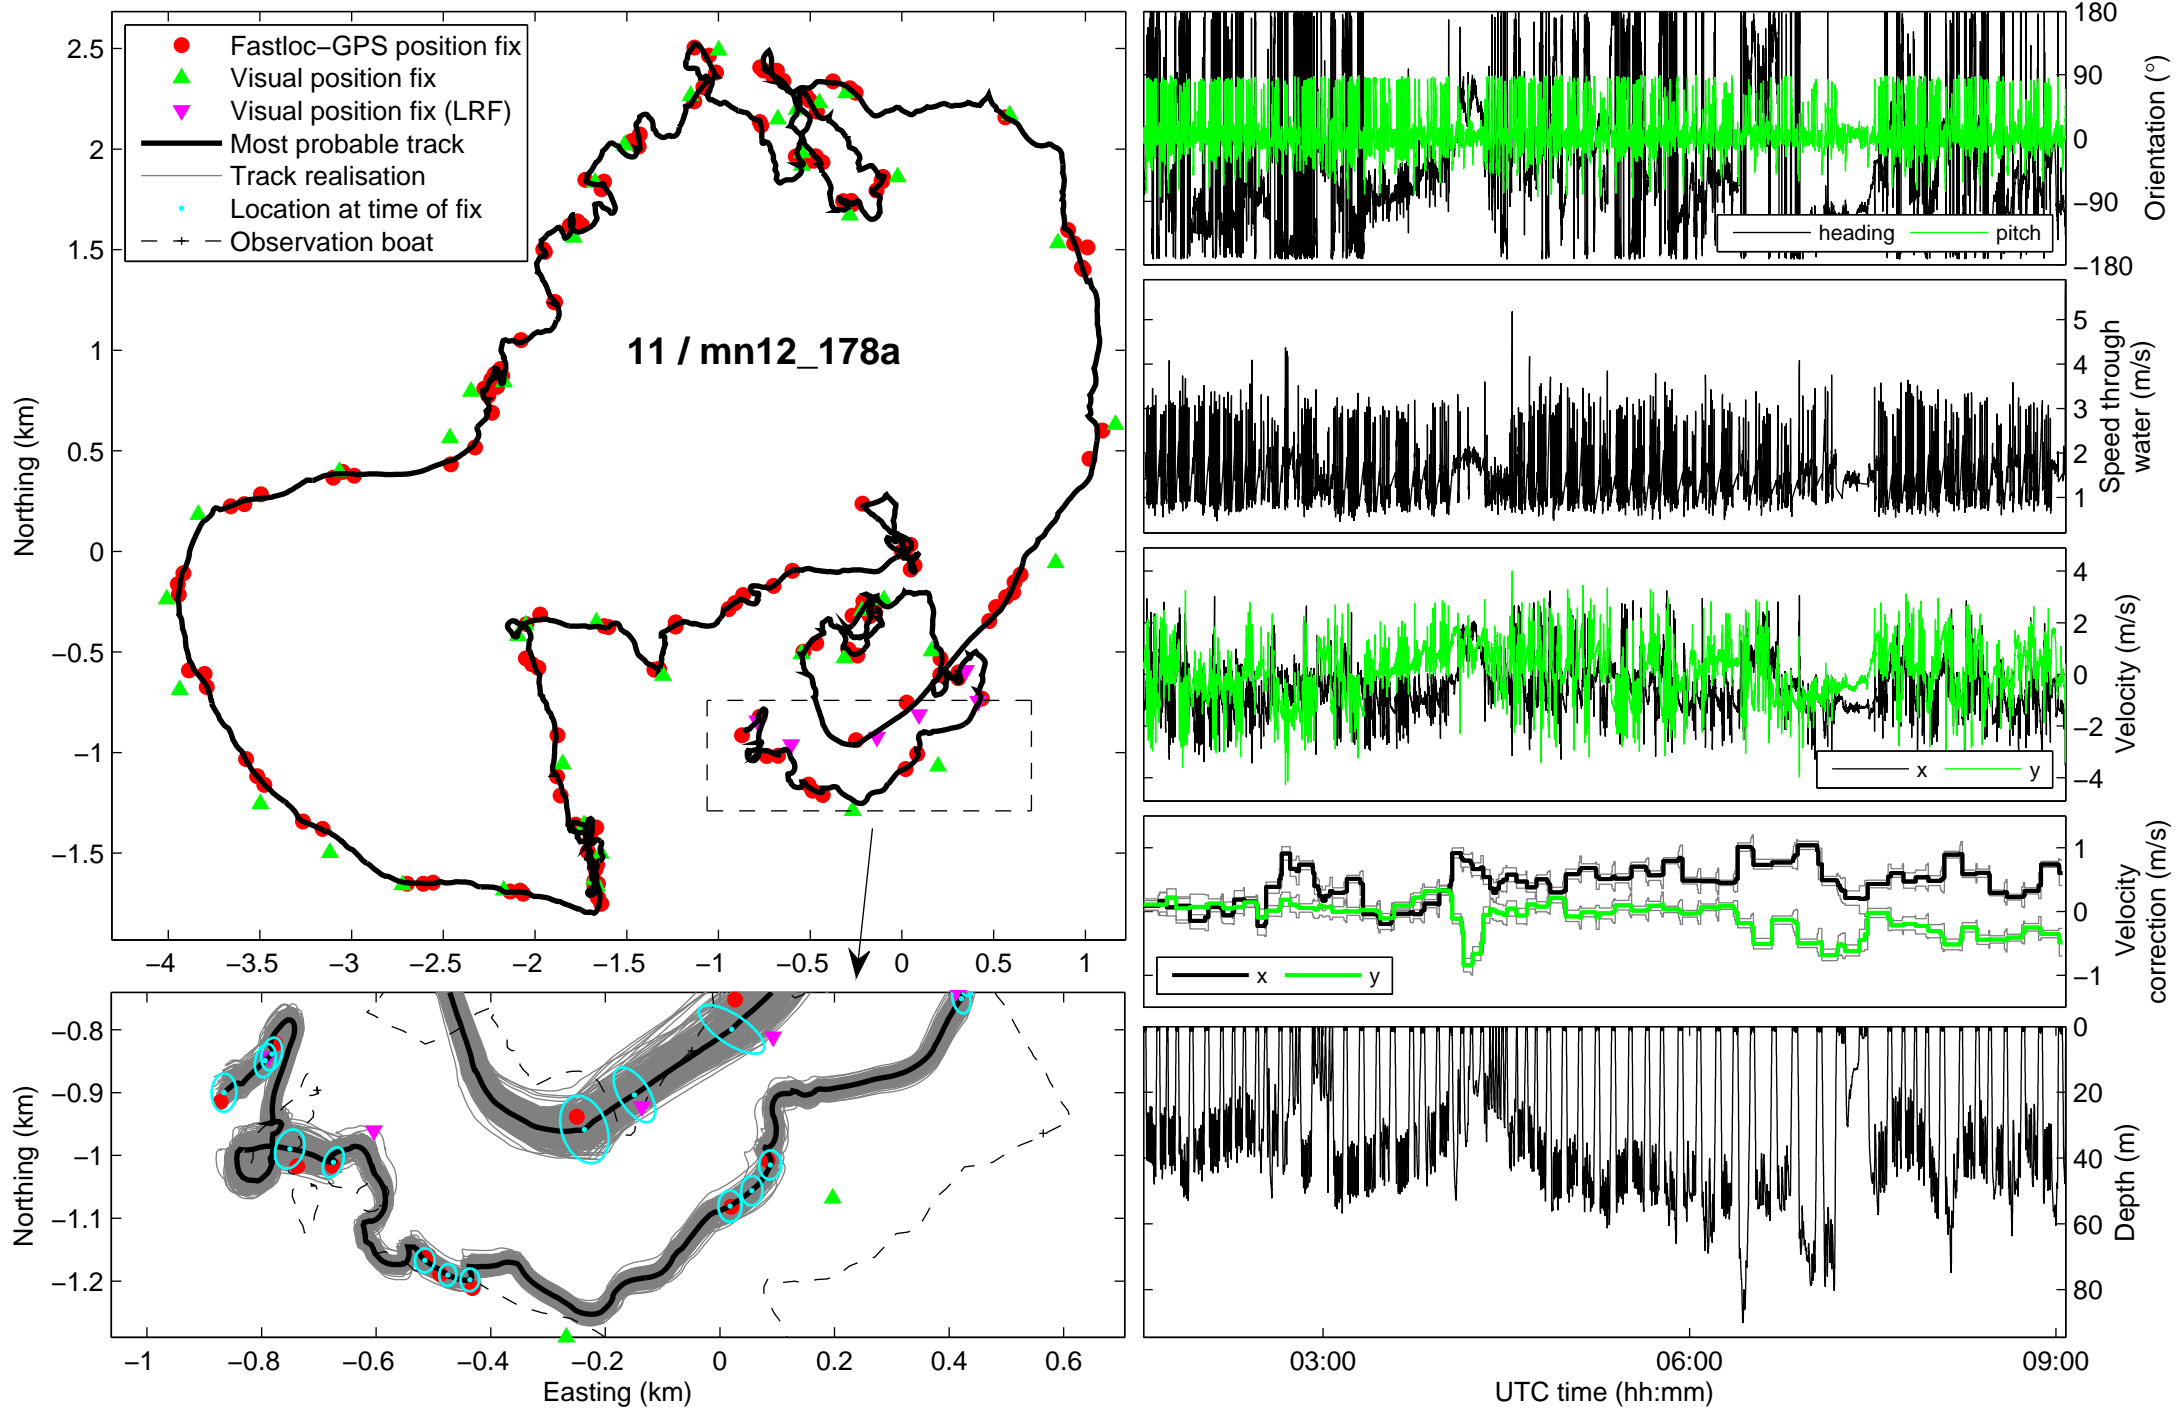

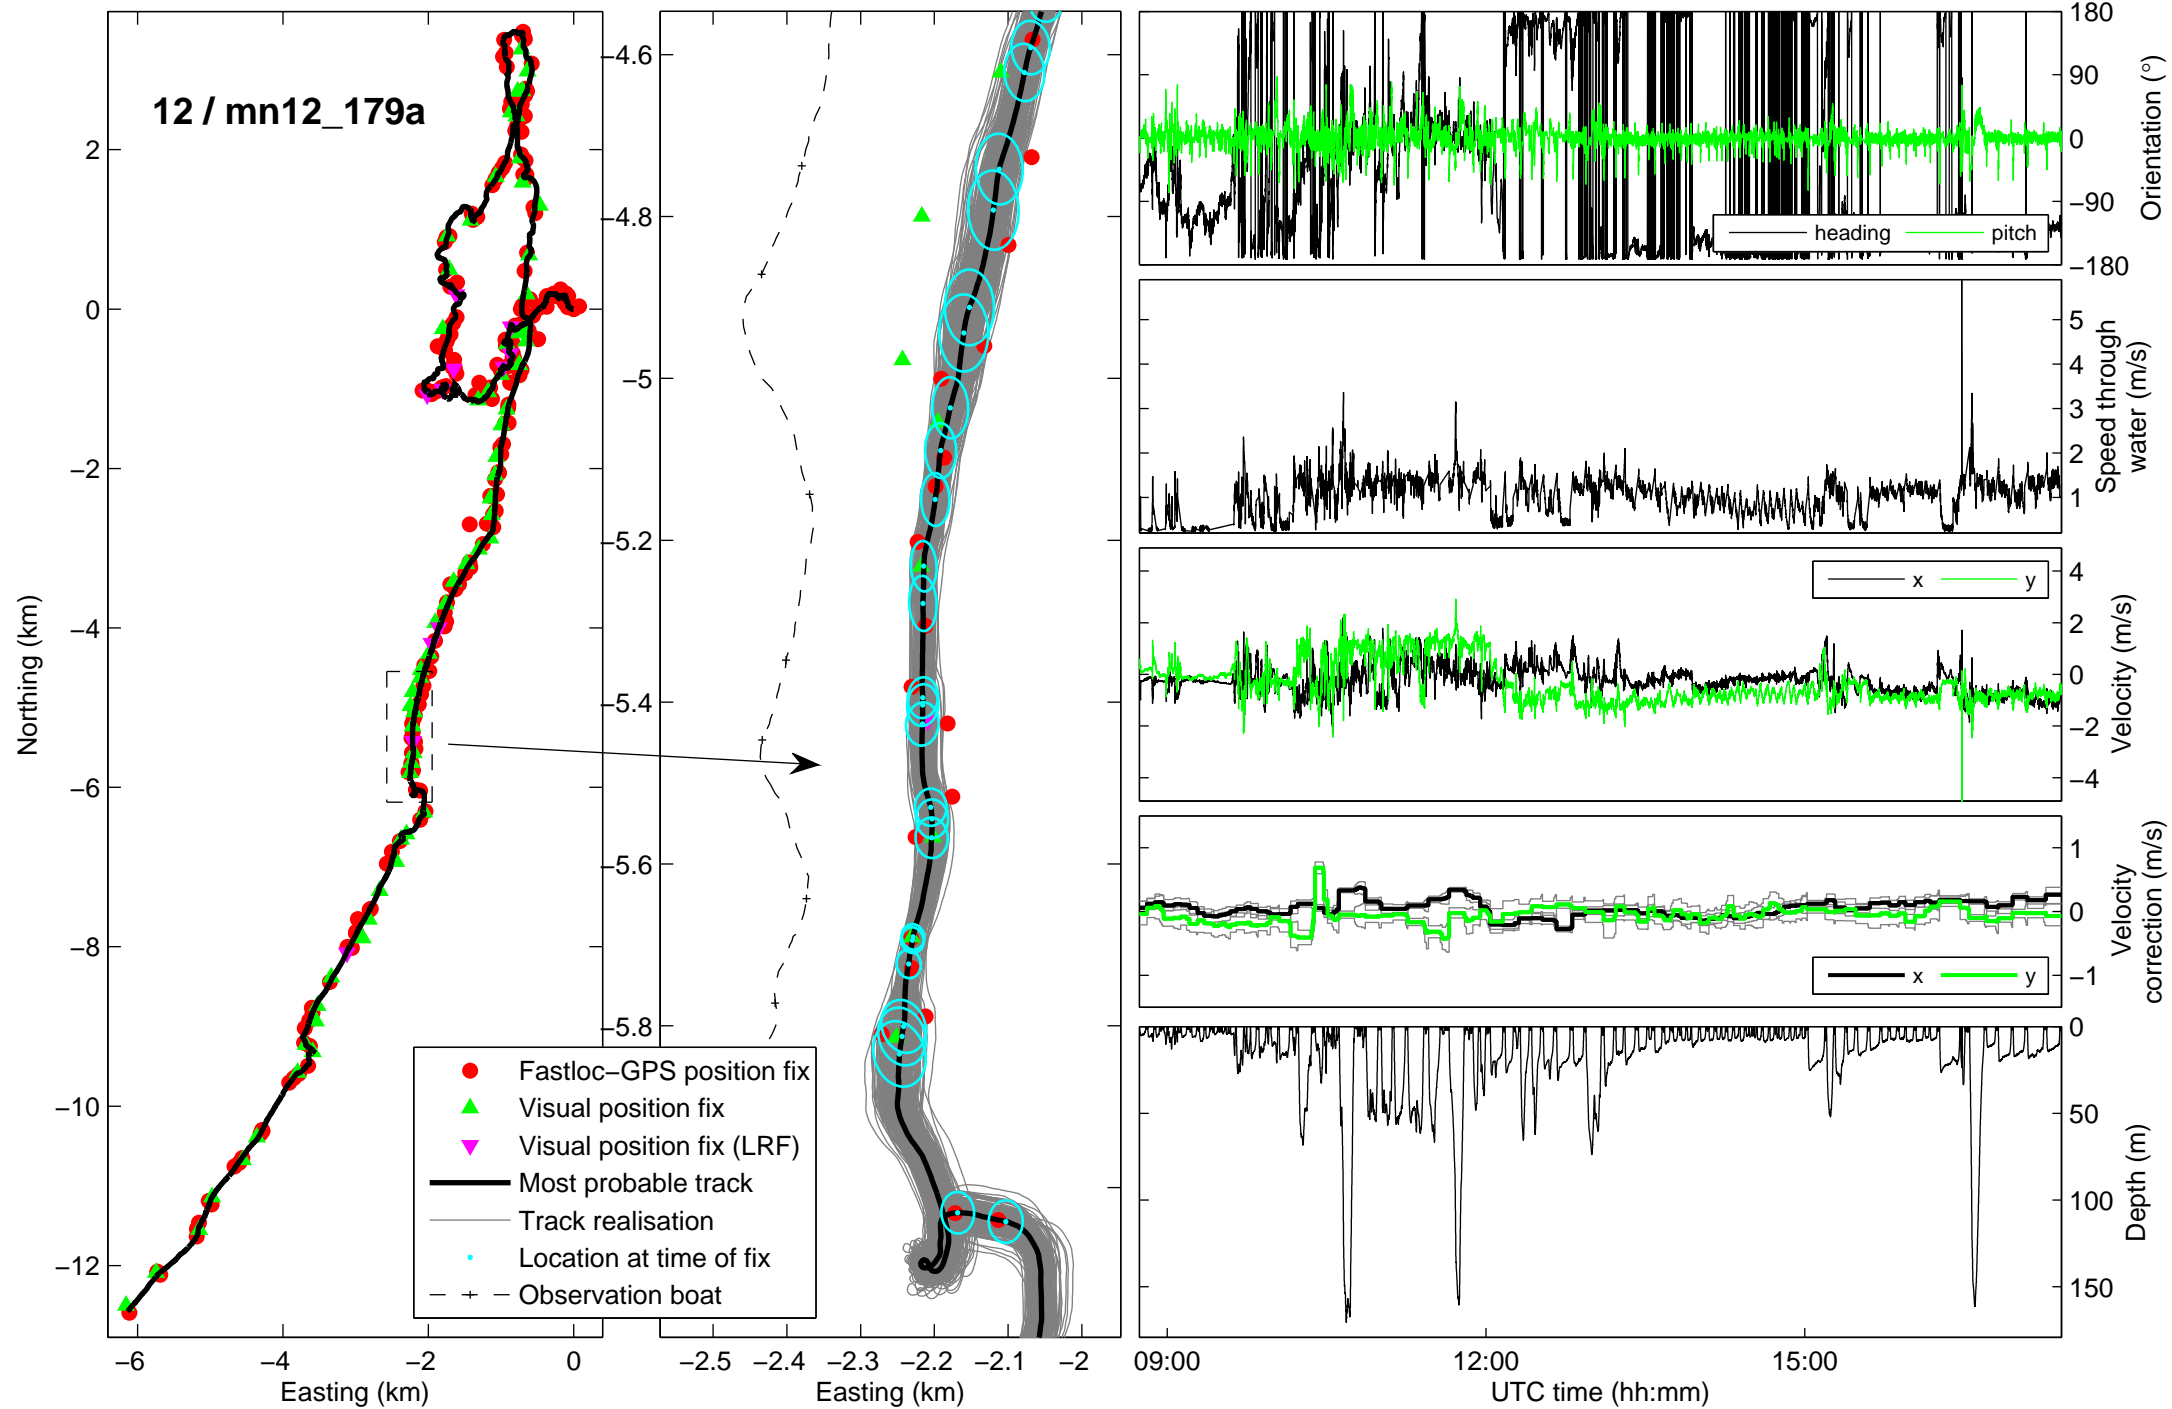

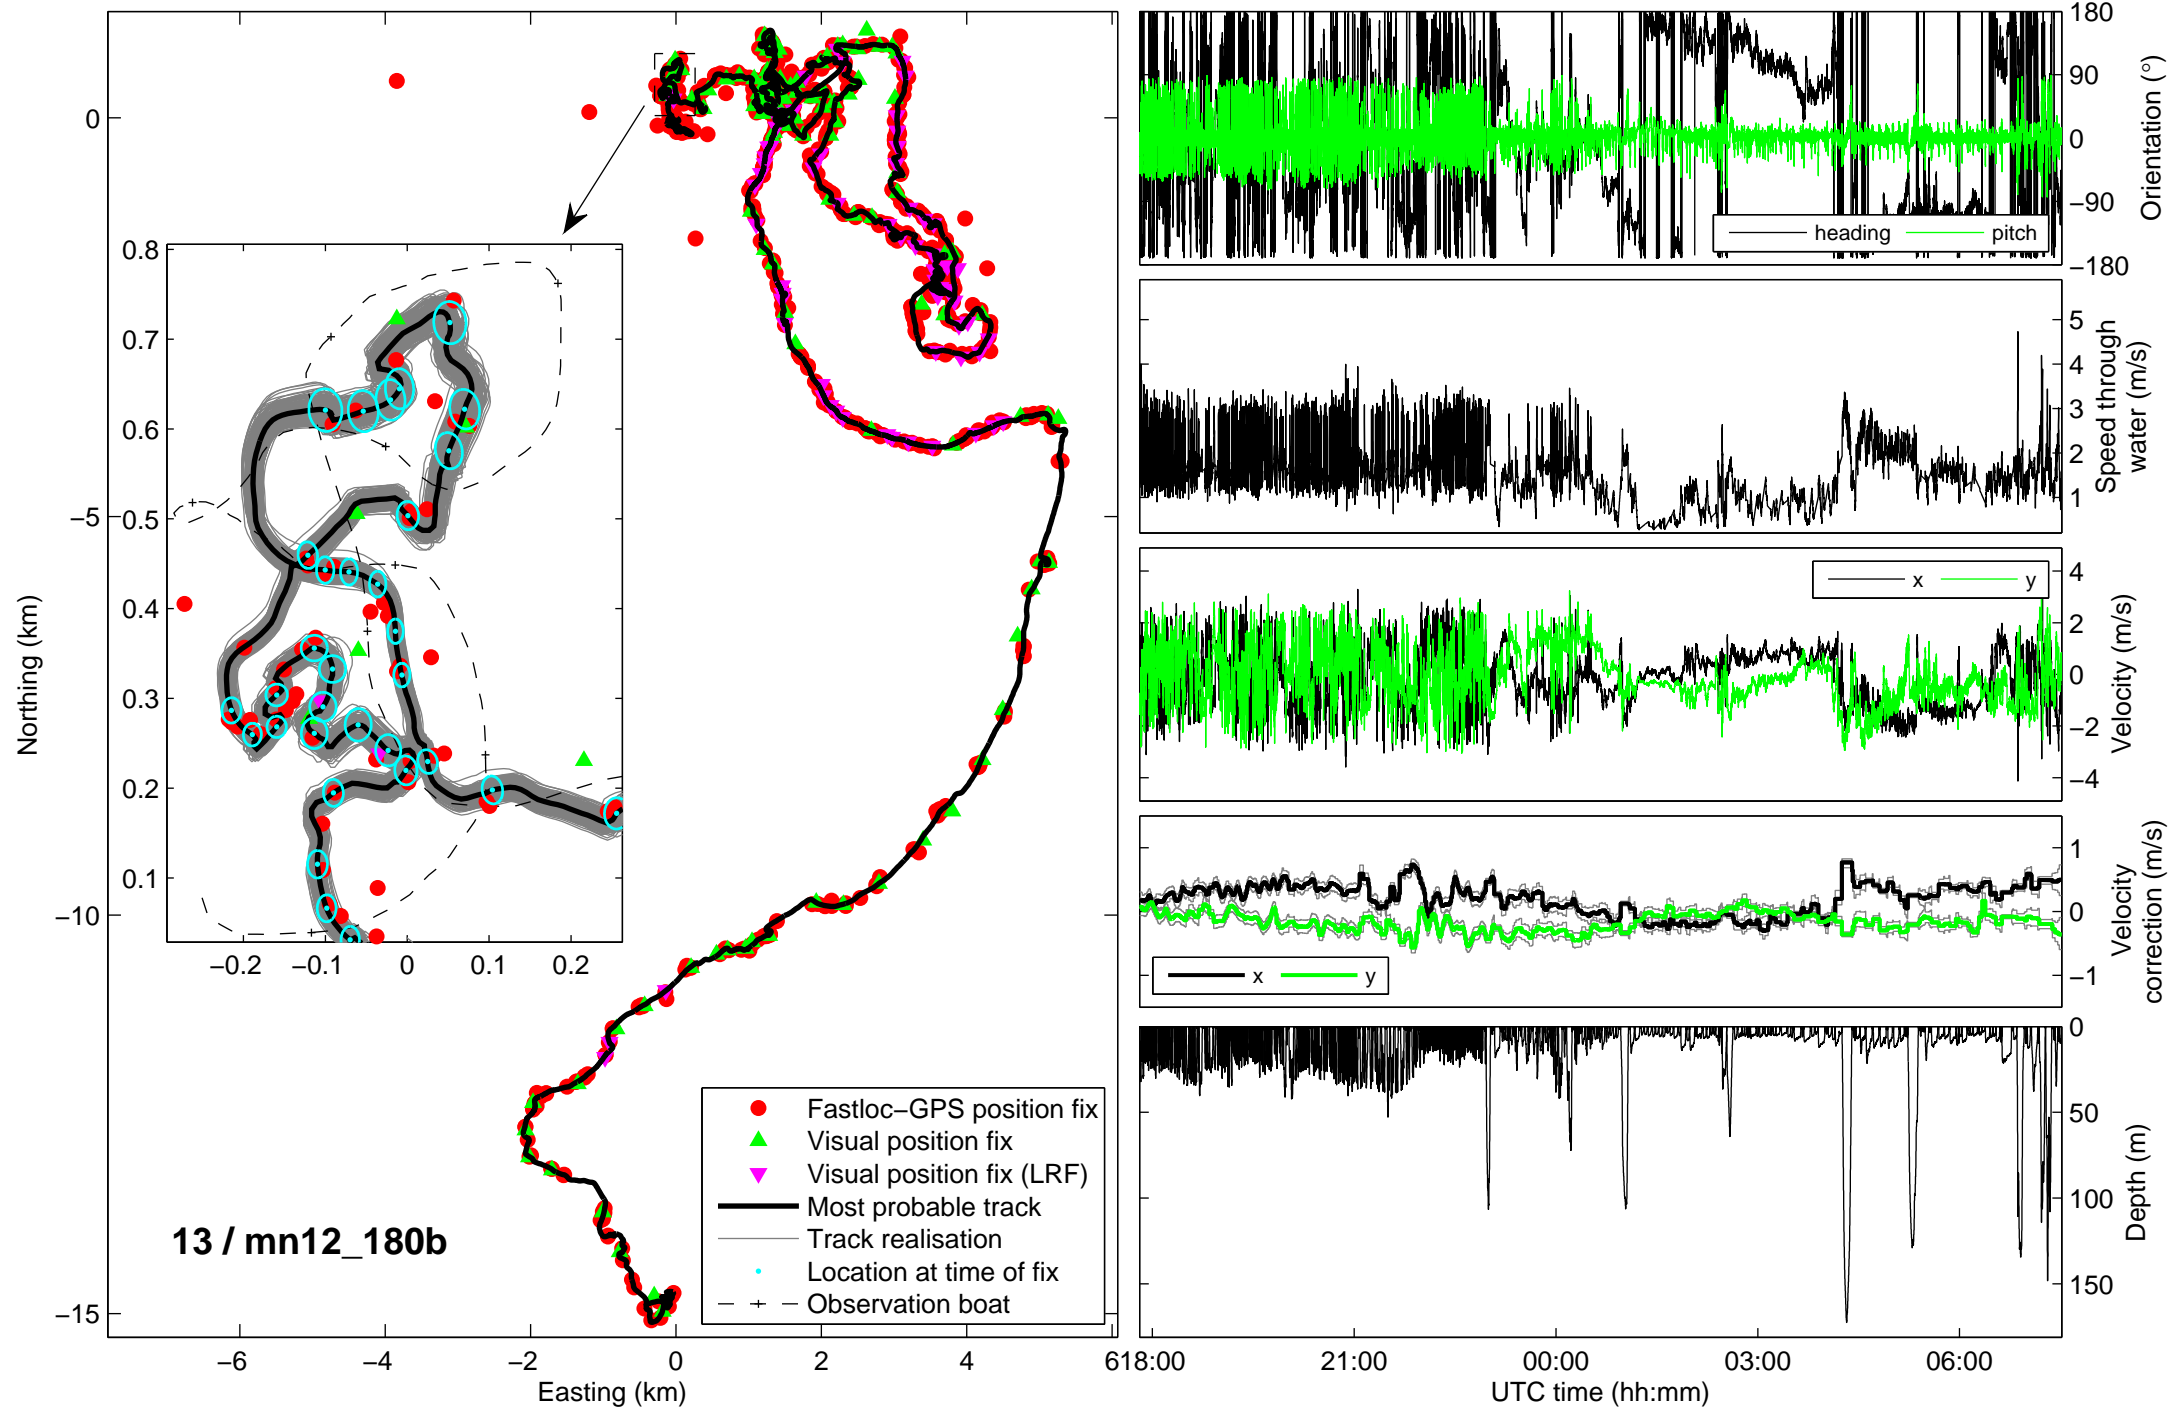

Supplement: 40462_2015_61_MOESM4_ESM.pdf [file 40462_2015_61_MOESM4_ESM.pdf]
